# Supplementary material for: Defining the conditions for the development of the emerging class of FeIII-based MRI contrast agents
Source: Royal Society of Chemistry journal article supplement (doi:10.1039/d1sc02200h), 2021-01-01
Supplement: d1sc02200h1.pdf [file d1sc02200h1.pdf]

**Electronic Supporting Information  
for**

**Defining the conditions for the development  
of the emerging class of Fe<sup>III</sup>-based MRI  
contrast agents**

Zsolt Baranyai,<sup>[a]</sup> Fabio Carniato,<sup>[b]</sup> Alessandro Nucera,<sup>[b]</sup> Dávid Horváth,<sup>[a,c]</sup> Lorenzo Tei,<sup>[b]</sup>  
Carlos Platas-Iglesias<sup>\*[c]</sup> and Mauro Botta<sup>\*[b]</sup>

- 
- [a] Dr. Z. Baranyai  
Bracco Research Centre  
Bracco Imaging S.p.A.  
Via Ribes 5, 10010, Colletterto Giacosa (Italy)
- [b] Prof. F. Carniato, A. Nucera, Prof. L. Tei, Prof. M. Botta  
Dipartimento di Scienze e Innovazione Tecnologica  
Università del Piemonte Orientale "A. Avogadro",  
Viale T. Michel 11, 15121 Alessandria, Italy  
Email: [mauro.botta@uniupo.it](mailto:mauro.botta@uniupo.it)
- [c] D. Horváth, Department of Physical Chemistry, University of Debrecen, H-4010, Debrecen, Egyetem tér 1., Hungary
- [d] Prof. C. Platas-Iglesias  
Centro de Investigacións Científicas Avanzadas (CICA) and Departamento de Química, Facultade de Ciencias  
Universidade da Coruña, 15071 A Coruña, Galicia, Spain  
Email: [carlos.platas.iglesias@udc.es](mailto:carlos.platas.iglesias@udc.es)

**Contents**

|                                                                                                                                                                 |    |
|-----------------------------------------------------------------------------------------------------------------------------------------------------------------|----|
| Synthesis of Fe(III) chelates .....                                                                                                                             | 3  |
| Characterization techniques .....                                                                                                                               | 3  |
| Computational details .....                                                                                                                                     | 4  |
| Equilibrium properties of Fe(EDTA) <sup>-</sup> and Fe(CDTA) <sup>-</sup> .....                                                                                 | 5  |
| Figure S3. Species distribution of Fe <sup>3+</sup> -EDTA system ([Fe <sup>3+</sup> ]=[EDTA]=1.0 mM, 298 K, 0.15 M NaNO <sub>3</sub> ) .....                    | 11 |
| Figure S4. Species distribution of Fe <sup>3+</sup> -CDTA system ([Fe <sup>3+</sup> ]=[CDTA]=1.0 mM, 298 K, 0.15 M NaNO <sub>3</sub> ) .....                    | 11 |
| Kinetic studies .....                                                                                                                                           | 11 |
| Redox stability .....                                                                                                                                           | 15 |
| Figure S11. <sup>1</sup> H NMRD profiles at different temperatures (283, 298 and 310 K) of Fe(CDTA) <sup>-</sup> ; [Fe <sup>3+</sup> ] = 4.87 mM, pH 6.98 ..... | 19 |
| Figure S12. <sup>1</sup> H NMRD profiles at different temperatures (283, 298 and 310 K) of Fe(EDTA) <sup>-</sup> ; [Fe <sup>3+</sup> ] = 8.98 mM, pH 5.3 .....  | 20 |

|                                                                                                                                                                                                                                                                         |    |
|-------------------------------------------------------------------------------------------------------------------------------------------------------------------------------------------------------------------------------------------------------------------------|----|
| Figure S13. Structure of the $[\text{Fe}(\text{H}_2\text{O})_6]^{3+} \cdot 12\text{H}_2\text{O}$ system optimized at the TPSSh/Def2-TZVP level. The Fe-O bond distance is 2.031 Å. ....                                                                                 | 21 |
| Figure S14. Structure of the $[\text{Fe}(\text{EDTA})(\text{H}_2\text{O})]^- \cdot 2\text{H}_2\text{O}$ (CT) system optimized at the TPSSh/Def2-TZVP level. ....                                                                                                        | 22 |
| Figure S15. Structure of the $[\text{Fe}(\text{EDTA})(\text{H}_2\text{O})]^- \cdot 2\text{H}_2\text{O}$ (PB) system optimized at the TPSSh/Def2-TZVP level. ....                                                                                                        | 23 |
| Figure S16. Structure of the $[\text{Fe}(\text{CDTA})(\text{H}_2\text{O})]^- \cdot 2\text{H}_2\text{O}$ (CT) system optimized at the TPSSh/Def2-TZVP level. ....                                                                                                        | 24 |
| Figure S17. Structure of the $[\text{Fe}(\text{CDTA})(\text{H}_2\text{O})]^- \cdot 2\text{H}_2\text{O}$ (PB) system optimized at the TPSSh/Def2-TZVP level. ....                                                                                                        | 25 |
| Figure S18. $^1\text{H}$ NMRD profiles at different temperatures (283, 298 and 310 K) of $\text{Fe}(\text{DTPA})^{2-}$ ; $[\text{Fe}^{3+}] = 5.31 \text{ mM}$ , pH 7.08. ....                                                                                           | 24 |
| Equations used for the analysis of $^{17}\text{O}$ NMR and NMRD data .....                                                                                                                                                                                              | 26 |
| Table S2. Calculated $r_{\text{FeO}}$ and $r_{\text{FeH}}$ distances and hyperfine coupling constants ( $A_{\text{O}}/\hbar$ and $A_{\text{H}}/\hbar$ ) obtained with DFT calculations and ZFS parameters obtained with CASSF/NEVPT2 calculations. <sup>[a]</sup> ..... | 29 |
| Table S4. Bond distances [ $\text{Å}$ ] of the metal coordination environment obtained with DFT calculations (TPSSh/Def2-TZVP). <sup>[a]</sup> .....                                                                                                                    | 30 |
| Table S5. Optimized Cartesian coordinates obtained for $[\text{Fe}(\text{H}_2\text{O})_6]^{3+} \cdot 12\text{H}_2\text{O}$ with DFT calculations (0 imaginary frequencies). ....                                                                                        | 30 |
| Table S6. Optimized Cartesian coordinates obtained for $[\text{Fe}(\text{EDTA})(\text{H}_2\text{O})]^- \cdot 2\text{H}_2\text{O}$ (capped trigonal prism, CTP) with DFT calculations (0 imaginary frequencies). ....                                                    | 32 |
| Table S7. Optimized Cartesian coordinates obtained for $[\text{Fe}(\text{EDTA})(\text{H}_2\text{O})]^- \cdot 2\text{H}_2\text{O}$ (pentagonal bipyramidal, PB) with DFT calculations (0 imaginary frequencies). ....                                                    | 33 |
| Table S8. Optimized Cartesian coordinates obtained for $[\text{Fe}(\text{CDTA})(\text{H}_2\text{O})]^- \cdot 2\text{H}_2\text{O}$ (capped trigonal prism, CTP) with DFT calculations (0 imaginary frequencies). ....                                                    | 34 |
| Table S9. Optimized Cartesian coordinates obtained for $[\text{Fe}(\text{CDTA})(\text{H}_2\text{O})]^- \cdot 2\text{H}_2\text{O}$ (pentagonal bipyramidal, PB) with DFT calculations (0 imaginary frequencies). ....                                                    | 35 |
| References .....                                                                                                                                                                                                                                                        | 36 |

## Synthesis of Fe(III) chelates

**[Fe(H<sub>2</sub>O)<sub>6</sub>]<sup>3+</sup>**: the solution was prepared by dissolving 3.1 mg of FeCl<sub>3</sub>·6H<sub>2</sub>O in 2 mL of HClO<sub>4</sub> 1 M. The solution was stirred at room temperature for few minutes to promote the complete dissolution of the salt.

**Fe(EDTA)**<sup>-</sup>: the complex was purchased from Sigma Aldrich. The solution used for the relaxometric and NMR analyses was prepared by dissolving the solid in water at pH 5.33.

**Fe(CDTA)**<sup>-</sup>: 4.5 mg of commercially available *trans*-1,2-Cyclohexylenedinitrilotetraacetic Acid (CDTA) were dissolved in 2 mL of milli-Q water and the pH was corrected to 2. A stoichiometric amount of FeCl<sub>3</sub>·6H<sub>2</sub>O was added to the ligand solution. The pH was again correct to 2.5 and the mixture was stirred at room temperature for 18 h. Finally, the pH was increased to 7 with diluted NaOH solution (0.1 M) to promote the precipitation of the free Fe<sup>3+</sup>. The solution was then centrifuged and filtered.

MS (ESI): m/z calcd for C<sub>14</sub>H<sub>18</sub>FeN<sub>2</sub>O<sub>8</sub>: 398.04; found: 400.21 (M + 2H<sup>+</sup>)

**Fe(DTPA)**<sup>2-</sup>: 11.6 mg of commercially available Diethylenetriaminepentaacetic acid were dissolved in 3.3 mL of milli-Q water and the pH was correct to 2.4 with nitric acid (0.1 M). An equimolar amount of Fe(NO<sub>3</sub>)<sub>3</sub>·9H<sub>2</sub>O was added to the solution. The pH was adjusted to 1.7 with diluted NaOH. After 2h, the pH of solution was increased to 7 to favor the precipitation of free Fe<sup>3+</sup>. Finally, the solution was centrifuged and filtered.

MS (ESI): m/z calcd for C<sub>14</sub>H<sub>18</sub>FeN<sub>3</sub>O<sub>10</sub>: 444.04; found: 447.26 (M + 3H<sup>+</sup>).

## Characterization techniques

*Mass spectrometry*: The mass spectra, obtained through the MS-ESI technique, were recorded using the Waters SQD 3100 Mass Detector.

*Relaxometric analysis*: the <sup>1</sup>H 1/T<sub>1</sub> NMRD profiles were obtained with a fast-field cycling Stellar SmartTracer relaxometer (Mede, Pavia, Italy) varying the magnetic-field strength from 0.00024 to 0.25 T (0.01 – 10 MHz range). The 1/T<sub>1</sub> values are measured with an absolute uncertainty of ±1%. Temperature was controlled with a Stellar VTC-91 airflow heater equipped with a calibrated copper–constantan thermocouple (uncertainty of ±0.1 K). Data at high fields (0.5–3T, corresponding to 20–120 MHz proton Larmor frequency) were collected with a High Field Relaxometer (Stelar) equipped with the HTS-110 3T Metrology Cryogen-free

Superconducting Magnet. The measurements were performed with a standard inversion recovery sequence (20 experiments, 2 scans) with a typical  $90^\circ$  pulse width of  $3.5 \mu\text{s}$ , and the reproducibility of the data was within  $\pm 0.5\%$ .

The  $\text{Fe}^{\text{III}}$  concentration was estimated by  $^1\text{H}$ -NMR (Bruker Advance III Spectrometer equipped with a wide bore 11.7 T magnet) measurements using Evans's method.<sup>1</sup>

*$^{17}\text{O}$  NMR measurements:* the spectra were acquired on a Bruker Avance III spectrometer (11.7 T) using a 5 mm probe under temperature control. An aqueous solution of the complexes ( $\approx 5$  mM for  $[\text{Fe}(\text{EDTA})]^-$  and  $[\text{Fe}(\text{CDTA})]^-$  and 39 mM for  $[\text{Fe}(\text{H}_2\text{O})_6]^{3+}$ ) was enriched to reach 2.0% of the  $^{17}\text{O}$  isotope (Cambridge Isotope). The transverse relaxation rates were measured from the signal width at half-height as a function of temperature in the 278-350 K range.

## Computational details

The geometries of  $[\text{Fe}(\text{H}_2\text{O})_6]^{3+} \cdot 12\text{H}_2\text{O}$ ,  $[\text{Fe}(\text{EDTA})(\text{H}_2\text{O})]^- \cdot 2\text{H}_2\text{O}$  and  $[\text{Fe}(\text{CDTA})(\text{H}_2\text{O})]^- \cdot 2\text{H}_2\text{O}$  were optimized using density functional theory (DFT) calculations with the TPSSh exchange correlation functional,<sup>2</sup> which belongs to the group of hybrid meta-GGA functionals, in conjunction with the Def2-TZVP basis set.<sup>3</sup> As demonstrated for Mn(II) complexes,<sup>4</sup> the inclusion of a few second-sphere water molecules is required for a better description of the distance between the metal ion and the coordinated water molecule, as well as the  $^{17}\text{O}$   $A/\hbar$  values of coordinated water molecules. Bond distances of the metal coordination environments are in good agreement with crystallographic data (Table S3). Geometry optimizations were followed by frequency calculations that confirmed the nature of the optimized structures are true energy minima on the potential energy surfaces. The calculation of hyperfine coupling constants was performed using the TPSSh functional, the aug-cc-pVTZ-J<sup>5</sup> basis set for Fe and the EPR-III<sup>6</sup> basis set for all other atoms. The output of the calculations provided the isotropic hyperfine coupling constants  $A_{\text{iso}}$ , which are related to the  $A/\hbar$  values obtained from NMR measurements by  $A/\hbar = A_{\text{iso}} \times 2\pi$ . Bulk solvent effects were considered throughout with the integral equation formalism of the polarized continuum model (IEF-PCM).<sup>7</sup> These calculations were performed with the Gaussian 09 program package (revision E.01).<sup>8</sup>

The geometries optimized as described above were used for state averaged complete active space self-consistent field (CASSCF) calculations,<sup>9</sup> which were carried out using the ORCA4 program (version 4.2.0).<sup>10</sup> Solvent effects (water) were incorporated using the SMD

solvation model.<sup>11</sup> The active space consisted in the five 3d electrons of Fe distributed over the five metal-based d orbitals [CAS(5,5)], using 1 sextet, 24 quartet and 75 doublet roots. These calculations used the Def2-TZVP basis set and were accelerated with the resolution of identity (RI) approximation<sup>12</sup> employing the Def2/JK<sup>13</sup> auxiliary basis set. Dynamic correlation was considered with the fully internally contracted variant of N-valence state perturbation theory (FIC-NEVPT2).<sup>14</sup> Spin-orbit coupling was considered in the framework of quasi-degenerate perturbation theory (QDPT).<sup>15</sup> Zero field splitting (ZFS) parameters were obtained within the effective Hamiltonian approximation. The axial (D) and rhombic (E) ZFS parameters are related to the energy of the ZFS  $\Delta$  by the following expression:<sup>16</sup>

$$\Delta = \sqrt{\frac{2}{3}D^2 + 2E^2} \quad [S1]$$

## Equilibrium properties of Fe(EDTA)<sup>-</sup> and Fe(CDTA)<sup>-</sup>

### Experimental

*Materials:* The chemicals used for the experiments were of the highest analytical grade. Fe(NO<sub>3</sub>)<sub>3</sub> was prepared by dissolving Fe<sub>2</sub>O<sub>3</sub> (99.9%, Fluka) in 6M HNO<sub>3</sub> and evaporating the excess acid. The solid Fe(NO<sub>3</sub>)<sub>3</sub> was dissolved in 0.1 M HNO<sub>3</sub> solution. The concentration of the Fe(NO<sub>3</sub>)<sub>3</sub> solution was determined by using excess of the standardized Na<sub>2</sub>H<sub>2</sub>EDTA solution. The excess of the Na<sub>2</sub>H<sub>2</sub>EDTA was measured with standardized ZnCl<sub>2</sub> solution and *xylenol orange* as indicator. The H<sup>+</sup> concentration of the Fe(NO<sub>3</sub>)<sub>3</sub> solution was determined by pH potentiometric titration in the presence of excess Na<sub>2</sub>H<sub>2</sub>EDTA. The concentration of the H<sub>4</sub>CDTA, Na<sub>2</sub>H<sub>2</sub>EDTA and H<sub>2</sub>HBED solutions (*Sigma*) was determined by pH-potentiometric titrations in the presence and absence of a 40-fold excess of Ca<sup>2+</sup>. The pH-potentiometric titrations were made with standardized 0.2 M NaOH.

*Equilibrium measurements:* The stability and protonation constants of Fe<sup>III</sup> complexes formed with EDTA and CDTA ligands were determined by pH-potentiometric and spectrophotometric studies. The protonation and dimerization constants of the Fe(EDTA)<sup>-</sup> and the Fe(CDTA)<sup>-</sup> complexes were determined using pH-potentiometry by titrating the pre-prepared complexes from pH=1.7 to pH=12 with 0.2 M NaOH ([FeL]=0.01 M). For the pH measurements and titrations, *Metrohm 888 Titrando* titration workstation *Metrohm-6.0234.110* combined electrode was used. Equilibrium measurements were carried out at a constant ionic strength

(0.15 M NaNO<sub>3</sub>) in 6 ml samples at 298 K. The solutions were stirred, and N<sub>2</sub> was bubbled through them. The titrations were made in the 1.7-12.0 pH range. KH-phthalate (pH=4.005) and borax (pH=9.177) buffers were used to calibrate the pH meter, For the calculation of [H<sup>+</sup>] from the measured pH values, the method proposed by *Irving et al.* was used as follows.<sup>17</sup> A 0.01M HNO<sub>3</sub> solution was titrated with standardized NaOH solution at 0.15 M NaNO<sub>3</sub> ionic strength. The differences (*A*) between the measured (pH<sub>read</sub>) and calculated pH (-log[H<sup>+</sup>]) values were used to obtain the equilibrium H<sup>+</sup> concentration from the pH values measured in the titration experiments (*A*=0.01). For the equilibrium calculations, the stoichiometric water ionic product (*pK<sub>w</sub>*) was also needed to calculate [OH<sup>-</sup>] values under basic conditions. The V<sub>NaOH</sub> – pH<sub>read</sub> data pairs of the HNO<sub>3</sub> – NaOH titration obtained in the pH range 10.5 – 12.0 were used to calculate the *pK<sub>w</sub>* value (*pK<sub>w</sub>*=13.81).

The stability constants of Fe(EDTA)<sup>-</sup> and Fe(CDTA)<sup>-</sup> were determined by spectrophotometric studies of the Fe<sup>3+</sup> - EDTA and Fe<sup>3+</sup> - CDTA systems at the absorption band of Fe<sup>III</sup> complexes at [H<sup>+</sup>] = 0.02 – 5.6 M in the wavelength range of 350 - 800 nm. The concentrations of Fe<sup>3+</sup>, EDTA and CDTA were 0.002 M. The H<sup>+</sup> concentration in the samples was adjusted with the addition of calculated amounts of 6 M HNO<sub>3</sub>. (*I*=[Na<sup>+</sup>]+[H<sup>+</sup>]=0.15, [H<sup>+</sup>]≤0.15 M). The samples were kept at 298 K for a week. The absorbance values of the samples were determined at 11 wavelengths (370, 380, 390, 395, 400, 405, 410, 415, 420, 425 and 430 nm). For the calculations of the stability and protonation constants of Fe(EDTA)<sup>-</sup> and Fe(CDTA)<sup>-</sup>, the molar absorptivities of Fe<sup>3+</sup>, Fe(EDTA)<sup>-</sup> and Fe(CDTA)<sup>-</sup> were determined by recording the spectra of 1.0×10<sup>-3</sup>, 1.5×10<sup>-3</sup>, 2.0×10<sup>-3</sup> and 2.5×10<sup>-3</sup> M solutions of Fe<sup>3+</sup>, Fe(EDTA)<sup>-</sup> and Fe(CDTA)<sup>-</sup> solutions. The absorption spectra of the Fe(EDTA)<sup>-</sup> and Fe(CDTA)<sup>-</sup> solutions were recorded in the pH range of 1.7 – 7.5. All spectrophotometric measurements were performed at 298 K in 0.15 M NaNO<sub>3</sub> solution. The pH was adjusted by stepwise addition of concentrated NaOH or HNO<sub>3</sub> solutions. The spectrophotometric measurements were made with the use of *PerkinElmer Lambda 365 UV-Vis* spectrophotometer, using 1.0 cm cells. The protonation and stability constants were calculated with the PSEQUAD program.<sup>18</sup>

### **Stability and protonation constants of Fe(EDTA)<sup>-</sup> and Fe(CDTA)<sup>-</sup>.**

The protonation constants of EDTA and CDTA ligands, defined by Eq. (S2), were determined by pH-potentiometry.

$$K_i^H = \frac{[H_iL]}{[H_{i-1}L][H^+]} \quad [S2]$$

where  $i=1, 2\dots6$ . The  $\log K_i^H$  values obtained by pH-potentiometry are listed in Table 1. Standard deviations ( $3\sigma$ ) are shown in parentheses.

The stability and protonation constants of  $\text{Fe}^{\text{III}}$  complexes formed with EDTA and CDTA, defined by Eqs. (S3) and (S4), were investigated by pH-potentiometry and spectrophotometry at 298 K in 0.15 M  $\text{NaNO}_3$  solution.

$$K_{\text{ML}} = \frac{[\text{ML}]}{[\text{M}][\text{L}]} \quad [\text{S3}]$$

$$K_{\text{MHL}} = \frac{[\text{MHL}]}{[\text{ML}][\text{H}^+]} \quad [\text{S4}]$$

The stability constants of  $\text{Fe}(\text{EDTA})^-$  and  $\text{Fe}(\text{CDTA})^-$  were determined by spectrophotometry. The equilibrium reaction (Eq. (S5)) was studied in the  $[\text{H}^+]$  range of 0.02 – 5.6 M (the ionic strength was constant  $I=[\text{Na}^+]+[\text{H}^+]=0.15$  in the samples  $[\text{H}^+] \leq 0.15$  M), where the formation of  $\text{Fe}^{3+}$ ,  $\text{FeHL}$ ,  $\text{FeL}$  and  $\text{H}_x\text{L}$  species was assumed ( $x=4$  and  $5$ ;  $y=3, 4$  and  $5$ ). Some characteristic absorption spectra are shown in Figures S1 and S2.

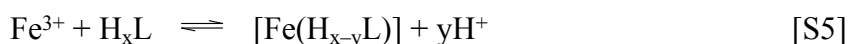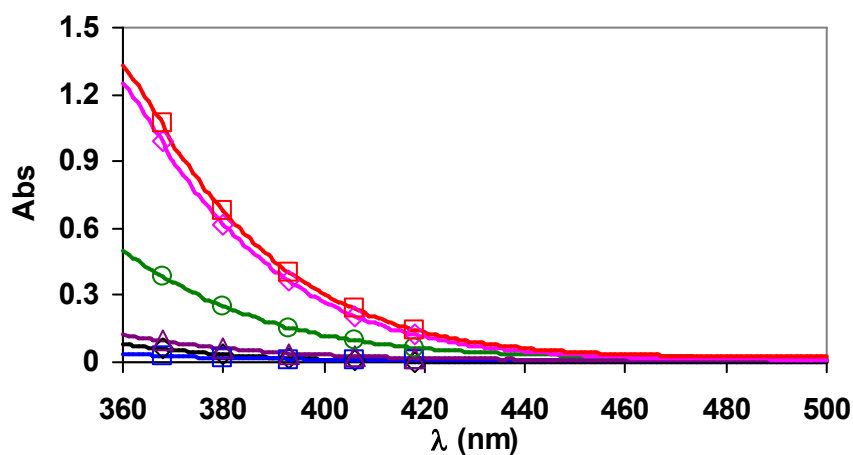

**Figure S1.** Absorption spectra of  $\text{Fe}^{3+}$  - EDTA systems. Solid lines and open symbols represent the measured and calculated absorbance values ( $[\text{Fe}^{3+}]=1.974$  mM,  $[\text{EDTA}]=1.996$  mM,  $[\text{H}^+]=5.686$  M, **3.000 M**, **1.498 M**, **0.997 M**, **0.329 M** and **0.100 M**,  $[\text{H}^+] \leq 0.15$  M  $\rightarrow$   $[\text{HNO}_3]+[\text{NaNO}_3]=0,15$  M, 298 K).

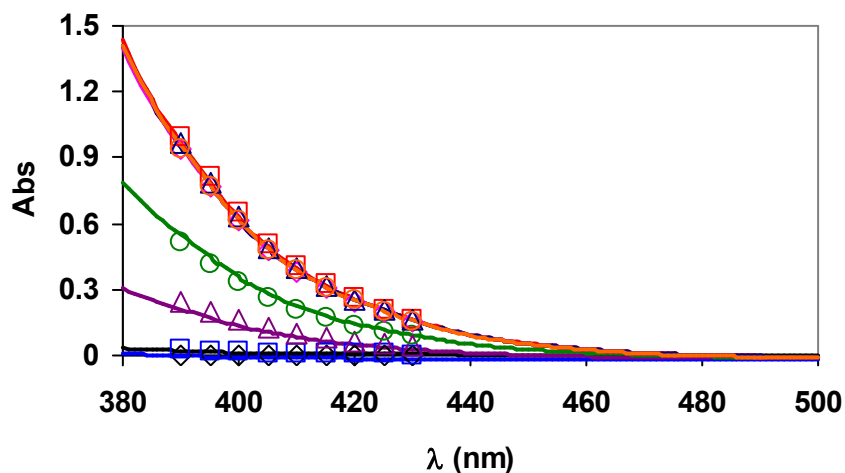

**Figure S2.** Absorption spectra of  $\text{Fe}^{3+}$  - CDTA systems. Solid lines and open symbols represent the measured and calculated absorbance values, respectively ( $[\text{Fe}^{3+}] = 1.989 \text{ mM}$ ,  $[\text{CDTA}] = 2.011 \text{ mM}$ ,  $[\text{H}^+] = 5.687 \text{ M}$ ,  $3.006 \text{ M}$ ,  $1.496 \text{ M}$ ,  $0.999 \text{ M}$ ,  $0.332 \text{ M}$ ,  $0.100 \text{ M}$ ,  $0.030 \text{ M}$  and  $0.017 \text{ M}$ ,  $[\text{H}^+] \leq 0.15 \text{ M} \rightarrow [\text{HNO}_3] + [\text{NaNO}_3] = 0.15 \text{ M}$ ,  $298 \text{ K}$ ).

Since the molar absorptivities of  $\text{Fe}^{3+}$  is significantly lower than that of  $\text{Fe}(\text{EDTA})^-$  and  $\text{Fe}(\text{CDTA})^-$  complexes in the wavelength range of  $360 - 440 \text{ nm}$ , the increase of the absorbance values of the  $\text{Fe}^{3+}$  - EDTA and  $\text{Fe}^{3+}$  - CDTA systems can be explained by the formation of  $\text{FeL}$  and  $\text{FeHL}$  species dominating at  $[\text{H}^+] < 1.5 \text{ M}$ .

The protonation constants of  $\text{Fe}(\text{EDTA})^-$  and  $\text{Fe}(\text{CDTA})^-$  complexes were determined by pH-potentiometric titrations of the complexes in the pH range  $1.7 - 12.0$  ( $[\text{FeL}] = 10 \text{ mM}$ ). At  $\text{pH} > 6.0$  the titrations curves indicate the base consumption process which can be interpreted by the hydrolysis of the  $\text{Fe}^{\text{III}}$  ion with the coordination of  $\text{OH}^-$  ion (Eq. (S6)) and by the dimerization of the  $\text{FeL}$  (Eq. (S7))  $\text{FeLH}_{-1}$  species (Eq. (S8)) via the formation of  $\mu$ -oxo dimers.

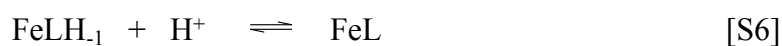

$$K_{\text{FeLH}_{-1}} = \frac{[\text{FeL}]}{[\text{FeLH}_{-1}][\text{H}^+]}$$

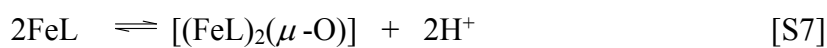

$$K_{\text{D}} = \frac{[(\text{FeL})_2(\mu\text{-O})][\text{H}^+]^2}{[\text{FeL}]^2}$$



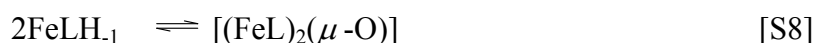

$$K_d = \frac{[(\text{FeL})_2(\mu\text{-O})]}{[\text{FeLH}_{-1}]^2}$$

According to the method proposed by Gustafson and Martell,<sup>19</sup> the protonation and dimerization constant of FeL and FeLH<sub>-1</sub> species were calculated from the pH potentiometric titration data ([FeL]<sub>tot</sub>, [NaOH]<sub>tot</sub>, pH, pA and pK<sub>w</sub>) obtained in the pH ranges 4.0 – 9.0 for Fe(EDTA)<sup>-</sup> and 7.5 – 10.5 for Fe(CDTA)<sup>-</sup>. The stability and protonation constants of the Fe<sup>III</sup>-complexes formed with EDTA and CDTA ligands are reported in Table S1.

**Table S1.** Protonation constants of EDTA and CDTA, stability and protonation constants of Fe(EDTA)<sup>-</sup> and Fe(CDTA)<sup>-</sup> complexes (298 K)

|                                        | CDTA                     |                                     | EDTA                                          |                                     |
|----------------------------------------|--------------------------|-------------------------------------|-----------------------------------------------|-------------------------------------|
| I                                      | 0.15 M NaNO <sub>3</sub> | 0.1 M KNO <sub>3</sub> <sup>a</sup> | 0.15 M NaNO <sub>3</sub>                      | 0.1 M KNO <sub>3</sub> <sup>b</sup> |
| log K <sub>1</sub> <sup>H</sup>        | 9.54 (2)                 | 12.30                               | 9.40 (1)                                      | 10.22                               |
| log K <sub>2</sub> <sup>H</sup>        | 6.08 (2)                 | 6.12                                | 6.10 (1)                                      | 6.18                                |
| log K <sub>3</sub> <sup>H</sup>        | 3.65 (3)                 | 3.49                                | 2.72 (1)                                      | 2.70                                |
| log K <sub>4</sub> <sup>H</sup>        | 2.69 (3)                 | 2.40                                | 2.08 (1)                                      | 2.00                                |
| log K <sub>5</sub> <sup>H</sup>        | 1.14 (4)                 | 1.60                                | 1.23 (1)                                      | –                                   |
| <b>Σ log K<sub>i</sub><sup>H</sup></b> | <b>23.11</b>             | <b>25.91</b>                        | <b>20.29 (-log K<sub>5</sub><sup>H</sup>)</b> | <b>21.10</b>                        |
|                                        | Fe(CDTA)                 |                                     | Fe(EDTA)                                      |                                     |
| I                                      | 0.15 M NaNO <sub>3</sub> | 0.1 M KNO <sub>3</sub> <sup>c</sup> | 0.15 M NaNO <sub>3</sub>                      | 0.1 M KNO <sub>3</sub> <sup>c</sup> |
| <b>log K<sub>FeL</sub></b>             | <b>24.36 (2)</b>         | <b>29.05</b>                        | <b>22.14 (4)</b>                              | <b>24.95</b>                        |
| <b>log K<sub>FeHL</sub></b>            | 1.77 (2)                 | –                                   | 1.12 (2)                                      | –                                   |
| <b>log K<sub>FeLH-1</sub></b>          | 9.50 (2)                 | 9.54                                | 7.51 (1)                                      | 7.52                                |
| <b>-log K<sub>D</sub></b>              | 17.64 (4)                | 18.03                               | 13.00 (3)                                     | 12.40                               |
| <b>log K<sub>d</sub></b>               | 1.40 (3)                 | 1.07                                | 2.02 (2)                                      | 2.64                                |

<sup>a</sup> Ref.<sup>20</sup>; <sup>b</sup> Ref.<sup>21</sup>; <sup>c</sup> Ref.<sup>22</sup>.

It well known that the equilibrium constants are generally determined in the presence of the constant ionic background (some salts like KCl, NaCl, etc.) which should be selected with the necessary care since its cation can react with the donor atoms of the ligand (determination of the protonation constants) or its counterion may interact with the metal ion (determination of the stability and protonation constant). The log K<sub>1</sub><sup>H</sup> and log K<sub>ML</sub> values, published in literature

were most frequently determined in 0.1 M KCl or 0.1 M Me<sub>4</sub>NCl.<sup>23</sup> The protonation constants of ligands particularly the log $K_1^H$  values determined in the presence of Na<sup>+</sup> ion are generally lower than those obtained in solutions, where the constant ionic strength was controlled by K<sup>+</sup> - or Me<sub>4</sub>N<sup>+</sup> salts. The log $K_1^H$  values obtained in NaCl, NaNO<sub>3</sub> or NaClO<sub>4</sub> solutions are lower because the interaction between the smaller Na<sup>+</sup> ion and the fully deprotonated ligands is stronger than that of the larger K<sup>+</sup> or Me<sub>4</sub>N<sup>+</sup> ions. The difference is particularly high for CDTA ligand which form relatively stable complexes with Na<sup>+</sup> (log $K_{Na(CDTA)}$ =4.66; 0.5 M Me<sub>4</sub>NCl, 298 K ;<sup>24</sup> log $K_{Na(EDTA)}$ =1.82; 0.1 M Me<sub>4</sub>NCl, 298 K)<sup>25</sup>. Moreover, the Cl<sup>-</sup> as a counter ion of the ionic background might interact with Fe<sup>3+</sup> ion via the formation of FeCl<sub>x</sub> complexes (x=1, 2, 3 and 4). Therefore, all the equilibrium studies were performed at 298 K in 0.15 M NaNO<sub>3</sub> solution.

Thus, background electrolyte NaNO<sub>3</sub> (0.15 M) was used to mimic the high Na<sup>+</sup> concentrations present *in vivo* (~0.15 M in blood plasma). Therefore, the log $K_1^H$  values of EDTA and CDTA are lower by 0.8 and 2.8 log $K$  units than in the presence of 0.1 M KNO<sub>3</sub> ionic background, as a result of the formation of Na(EDTA)<sup>3-</sup> and Na(CDTA)<sup>3-</sup> complexes. Also the stability constant of the Fe(EDTA)<sup>-</sup> and Fe(CDTA)<sup>-</sup> complexes are lower by 2.8 and 4.7 log $K$  units than the log $K_{FeL}$  values previously measured in 0.1 M KNO<sub>3</sub> (Table S1).<sup>22</sup> These results show that the high Na<sup>+</sup> concentrations present *in vivo* (~0.15 M in blood plasma) have a significant impact in the stability of the complexes. The equilibrium constants characterizing the formation of FeLH<sub>1</sub> (log $K_{FeLH-1}$ , Eq. (S6)) and the dimeric [(FeL)<sub>2</sub>(μ-O)] species by the dimerization of FeL (-log $K_D$ , Eq. (S7)) and FeLH<sub>1</sub> species (log $K_d$ , Eq. (S8)) of Fe(EDTA)<sup>-</sup> and Fe(CDTA)<sup>-</sup> are very similar in 0.15 M NaNO<sub>3</sub> and 0.1 M KNO<sub>3</sub> solutions. In accordance with previous studies,<sup>19,22</sup> the  $K_D$  and  $K_d$  values confirm the lower tendency of Fe(CDTA)<sup>-</sup> to form the oxo-bridged dimer than Fe(EDTA)<sup>-</sup>. The speciation diagrams obtained with the equilibrium constants (Figure S3 and S4) evidence that Fe(CDTA)<sup>-</sup> does not hydrolyze significantly at physiological pH, while the EDTA complex presents significant populations of the hydroxo-complex and μ-oxo dimer at pH 7.4.

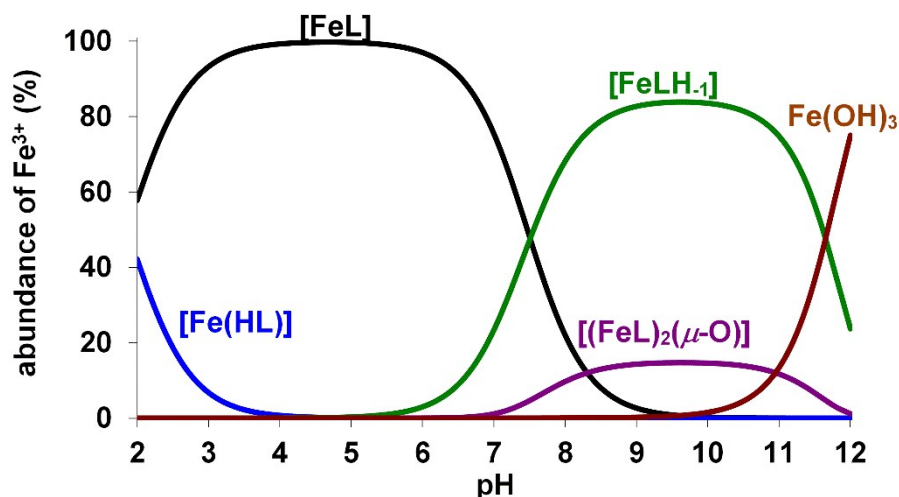

**Figure S3.** Species distribution of  $\text{Fe}^{3+}$ -EDTA system ( $[\text{Fe}^{3+}] = [\text{EDTA}] = 1.0 \text{ mM}$ , 298 K, 0.15 M  $\text{NaNO}_3$ ).

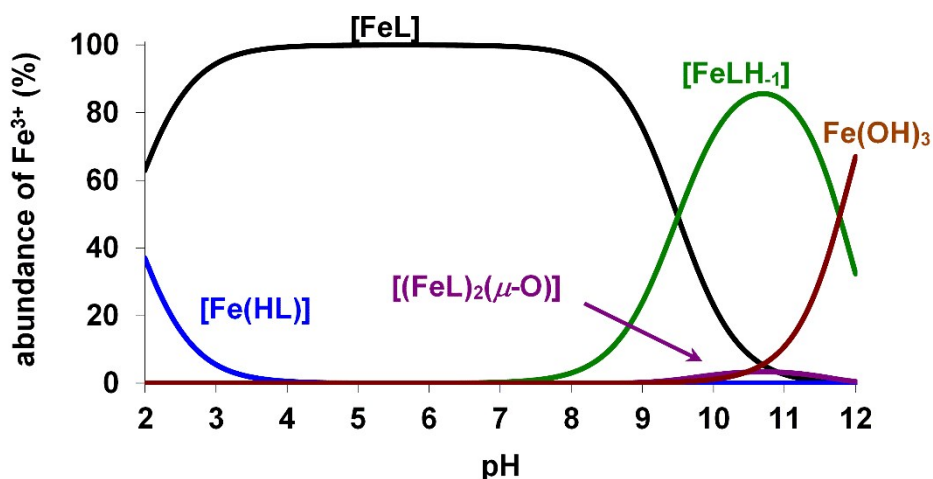

**Figure S4.** Species distribution of  $\text{Fe}^{3+}$ -CDTA system ( $[\text{Fe}^{3+}] = [\text{CDTA}] = 1.0 \text{ mM}$ , 298 K, 0.15 M  $\text{NaNO}_3$ ).

## Kinetic studies

### Experimental

The kinetic inertness of the  $\text{Fe}(\text{EDTA})^-$  and  $\text{Fe}(\text{CDTA})^-$  was characterized by the rates of the transchelation reactions taking place with HBED ligand. The exchange reactions with HBED were studied by spectrophotometry, following the formation of the  $\text{Fe}(\text{HBED})^-$  complexes at 480 nm with *PerkinElmer Lambda 365* UV-Vis spectrophotometer. The concentration of the FeL complex was 0.2 mM, while the concentration of the HBED was 10 and 20 times higher, to guarantee pseudo-first-order conditions. The temperature was maintained at 298 K and the ionic strength of the solutions was kept constant, 0.15 M for  $\text{NaNO}_3$ . The exchange rates were

studied in the pH range about 7.4 – 12.5. For keeping the pH values constant, HEPES (pH range 7.4 – 8.5), piperazine (pH range 8.5 – 10.5) and Na<sub>2</sub>HPO<sub>4</sub> (pH range 11.0 – 12.5) buffers (0.01 M) were used. The pseudo-first-order rate constants ( $k_d$ ) were calculated by fitting the absorbance data to Eq. (S9).

$$A_t = (A_0 - A_p)e^{-k_d t} + A_p \quad [S9]$$

where  $A_t$ ,  $A_0$  and  $A_p$  are the absorbance values at time  $t$ , the start of the reaction and at equilibrium, respectively. The calculation of the kinetic parameters were performed by the fitting of the absorbance - time data pairs to Eq. (S9) with the *Micromath Scientist* computer program (version 2.0, Salt Lake City, UT, USA).

### Kinetic inertness of Fe(EDTA)<sup>-</sup> and Fe(CDTA)<sup>-</sup>

The rates of the transchelation reactions (Eq. (S10)) between FeL complexes and HBED were studied by spectrophotometry. Some characteristic absorption spectra are shown in Figures S5 and S6.

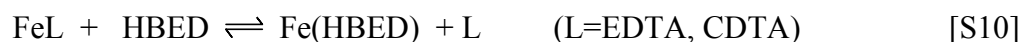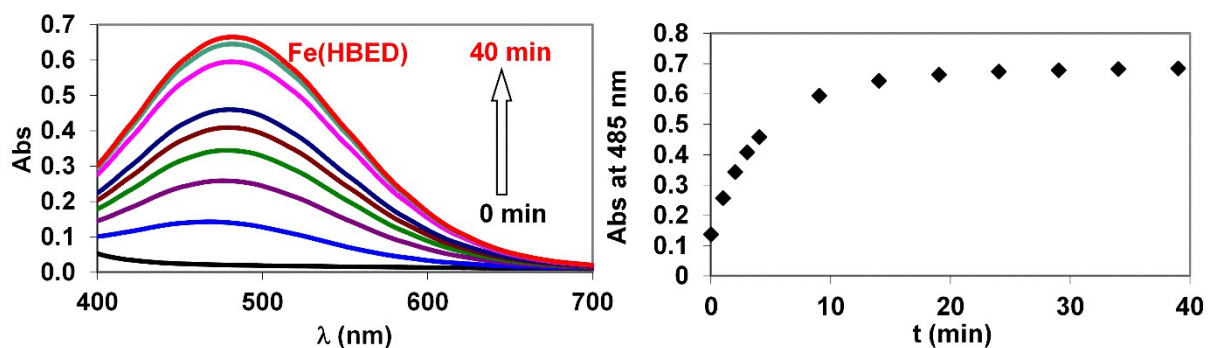

**Figure S5.** Absorption spectra of Fe(EDTA)<sup>-</sup> – HBED reacting system [Fe(EDTA)<sup>-</sup>]=2.0×10<sup>-4</sup> M, [HBED]=2.0×10<sup>-3</sup> M, pH=11.05, [Na<sub>2</sub>HPO<sub>4</sub>]=0.01 M, 0.15 M NaNO<sub>3</sub>, 298 K).

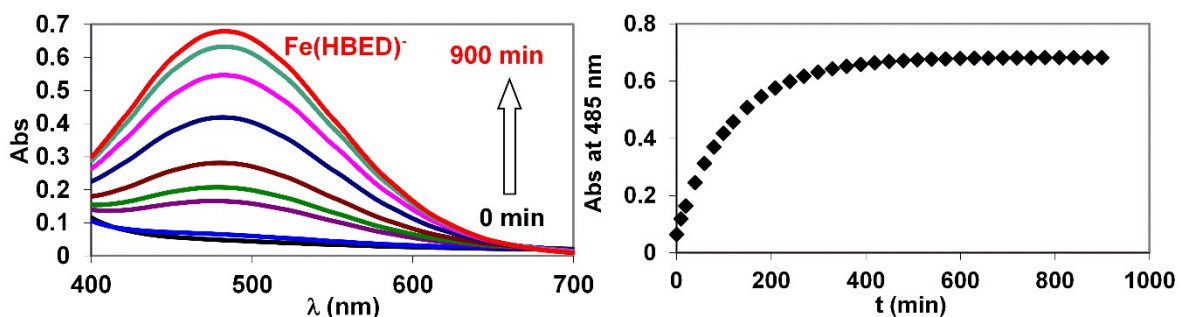

**Figure S6.** Absorption spectra of  $\text{Fe}(\text{CDTA})^-$  – HBED reacting system ( $[\text{Fe}(\text{CDTA})^-]=2.0 \times 10^{-4}$  M,  $[\text{HBED}]=2.0 \times 10^{-3}$  M,  $\text{pH}=11.94$ ,  $[\text{Na}_2\text{HPO}_4]=0.01$  M,  $0.15$  M  $\text{NaNO}_3$ ,  $298$  K).

In the presence of excess exchanging HBED ligand the transchelation can be treated as a pseudo-first-order process and the rate of the reactions can be expressed with the Eq. (S11), where  $k_d$  is a pseudo-first-order rate constant and  $[\text{GdL}]_t$  is the total concentration of the complex.

$$-\frac{d[\text{FeL}]_t}{dt} = k_d[\text{FeL}]_t \quad [\text{S11}]$$

The rates of the transmetallation reactions were studied at different concentrations of the HBED ligand in the pH range 7.4 – 12.5. The obtained pseudo-first order rate constants  $k_d$  are presented in Figure S7 as a function of pH.

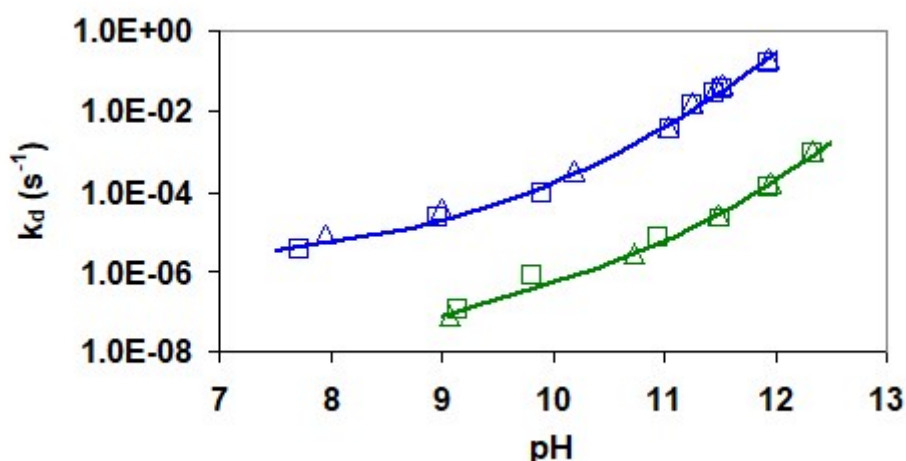

**Figure S7.**  $k_d$  pseudo-first-order rate constant characterizing the transchelation reactions of  $\text{Fe}(\text{EDTA})^-$  and  $\text{Fe}(\text{CDTA})^-$  with HBED ligand. Solid lines and the open symbols represent the calculated and measured  $k_d$  rate constants. ( $[\text{Fe}(\text{EDTA})^-]=[\text{Fe}(\text{CDTA})^-]=2.0 \times 10^{-4}$  M,  $[\text{HBED}]=2.0$  (●, ○) and  $4.0$  mM (□, □),  $[\text{HEPES}]=[\text{piperazine}]=[\text{Na}_2\text{HPO}_4]=0.01$  M,  $0.15$  M  $\text{NaNO}_3$ ,  $298$  K).

The kinetic data presented in Figure S7 show that the  $k_d$  values are independent on [HBED] and increase with pH, indicating that the rate-determining step of the transchelation reactions is the dissociation of the  $\text{Fe}(\text{EDTA})^-$  and  $\text{Fe}(\text{CDTA})^-$  complexes, followed by the fast reaction between the free  $\text{Fe}^{3+}$  ion and the exchanging HBED ligand. By considering the species distribution of  $\text{Fe}^{3+}$  - EDTA and  $\text{Fe}^{3+}$  - CDTA systems, the dependence of the  $k_d$  values on pH can be interpreted as spontaneous dissociation ( $k_0$ , Eq. (S12)) and  $\text{OH}^-$ -ion assisted dissociation ( $k_{\text{OH}}$ , Eq. (S13) and  $k_{\text{OH}}^2$ , Eq. (S14)) of the  $\text{FeLH}_{-1}$  species dominates in the investigated pH ranges.

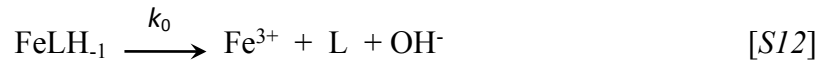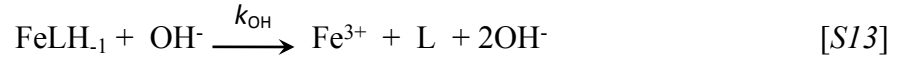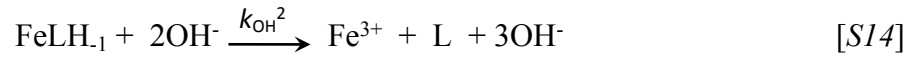

By taking into account all possible pathways and Eq. (S11), the rate of the dissociation of  $\text{Fe}(\text{EDTA})^-$  and  $\text{Fe}(\text{CDTA})^-$  can be expressed by Eq. (S15).

$$-\frac{d[\text{FeL}]_t}{dt} = k_d[\text{FeL}]_t = k_0[\text{FeLH}_{-1}] + k_{\text{OH}}[\text{FeLH}_{-1}][\text{OH}^-] + k_{\text{OH}}^2[\text{FeLH}_{-1}][\text{OH}^-]^2 \quad [\text{S15}]$$

Considering the total concentration of the  $\text{Fe}(\text{EDTA})^-$  and  $\text{Fe}(\text{CDTA})^-$  complexes ( $[\text{FeL}]_t = [\text{FeL}] + [\text{FeLH}_{-1}]$ ) and the protonation constant of  $\text{FeLH}_{-1}$  ( $K_{\text{FeLH}_{-1}}$ , Eq. (S6)), the  $k_d$  pseudo-first-order rate constants presented can be expressed by Eq. (S16). Based on the species distribution of the  $\text{Fe}^{3+}$  - EDTA and  $\text{Fe}^{3+}$  - CDTA systems at  $[\text{Fe}^{3+}] = [\text{EDTA}] = [\text{CDTA}] = 0.2$  mM, the formation of the dimeric  $[(\text{FeL})_2(\mu\text{-O})]$  species can be neglected in our experimental conditions.

$$k_d = \frac{k_0 + k_{\text{OH}}(K_w / [\text{H}^+]) + k_{\text{OH}}^2(K_w / [\text{H}^+])^2}{1 + K_{\text{FeLH}_{-1}}[\text{H}^+]} \quad [\text{S16}]$$

wherein  $k_0$ ,  $k_{\text{OH}}$  and  $k_{\text{OH}}^2$  are the rate constants characterizing the spontaneous and  $\text{OH}^-$  assisted dissociation of  $\text{FeLH}_{-1}$  species,  $K_w$  is the stoichiometric water ionic product, whereas  $K_{\text{FeLH}_{-1}}$  is the protonation constant of the  $\text{FeLH}_{-1}$  species. The rate and protonation constants

characterizing the transchelation reactions of Fe(EDTA)<sup>-</sup> and Fe(CDTA)<sup>-</sup> complexes with HBED were calculated by fitting the  $k_d$  values presented in Figure S7 to the Eq. (S16).

## Redox stability

### Experimental

The redox stability of the Fe(EDTA)<sup>-</sup> and Fe(CDTA)<sup>-</sup> was characterized by the rates of their reduction with ascorbic acid (*Sigma Aldrich*). The reduction of the Fe<sup>III</sup>-complexes was studied by spectrophotometry, following the formation of the Fe<sup>II</sup>L complexes at 390 nm with *PerkinElmer Lambda 365 UV-Vis* spectrophotometer. The concentration of the Fe(EDTA)<sup>-</sup> and Fe(CDTA)<sup>-</sup> complexes was 2.0 mM, while the concentration of the ascorbic acid was 5 - 40 times higher, in order to guarantee the pseudo-first-order condition. In all experiments a four-fold excess of free ligand was added to the Fe(EDTA)<sup>-</sup> and Fe(CDTA)<sup>-</sup> complexes. Under these conditions, the reaction which was assumed to take place is the reduction of the Fe<sup>III</sup>-complex to the Fe<sup>II</sup>-complex. The temperature was maintained at 298 K and the ionic strength of the solutions was kept constant, 0.15 M for NaNO<sub>3</sub>. The exchange rates were studied at pH=7.4. For keeping the pH values constant HEPES buffer were used ([HEPES]=0.01 M). In the sample preparation Ar was bubbled through all solutions to maintain oxygen free condition. The pseudo-first-order rate constants ( $k_{obs}$ ) were calculated by fitting the absorbance - time data pairs to Eq. (S9) ( $k_d = k_{obs}$ ) with the *Micromath Scientist* computer program (version 2.0, Salt Lake City, UT, USA).

### Redox stability of Fe(EDTA)<sup>-</sup> and Fe(CDTA)<sup>-</sup>

The redox stability of Fe(EDTA)<sup>-</sup> and Fe(CDTA)<sup>-</sup> was studied by following the reduction of the Fe<sup>III</sup>-complexes (Eq. (S17)) by spectrophotometry in the presence of ascorbic acid. Some characteristic absorption spectra are shown in Figures S8 and S9.

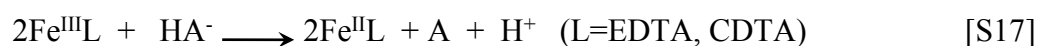

In the presence of excess ascorbic acid the reduction of the Fe<sup>III</sup>-complexes can be treated as a pseudo-first-order process and the rate of reactions can be expressed with Eq. (S18), where  $k_{obs}$  is a pseudo-first-order rate constant and  $[\text{FeL}]_t$  is the total concentration of the Fe<sup>III</sup>-complexes.

$$-\frac{d[\text{FeL}]_t}{dt} = k_{obs}[\text{FeL}]_t \quad [\text{S18}]$$

Rates of the reduction of the Fe<sup>III</sup>-complexes were studied at pH=7.4 and at different concentrations of ascorbic acid. The obtained pseudo-first order rate constants  $k_{\text{obs}}$  as a function of [HA<sup>-</sup>] are presented in Figure S10.

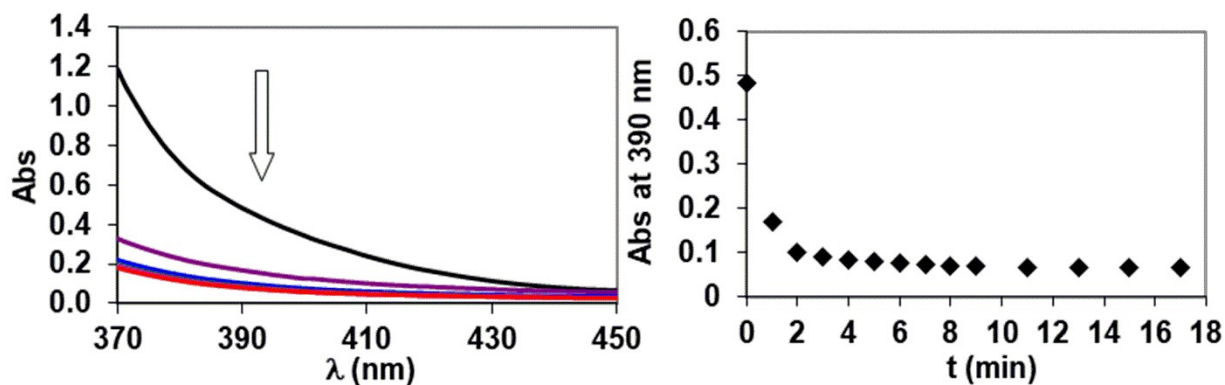

**Figure S8.** Absorption spectra and absorbance values of the Fe(EDTA)<sup>-</sup> – ascorbic acid reacting system ([Fe(EDTA)<sup>-</sup>]= $2.0 \times 10^{-3}$  M, [ascorbic acid]=0.02 M, pH=7.40, [HEPES]=0.01 M, 0.15 M NaNO<sub>3</sub>, 298 K).

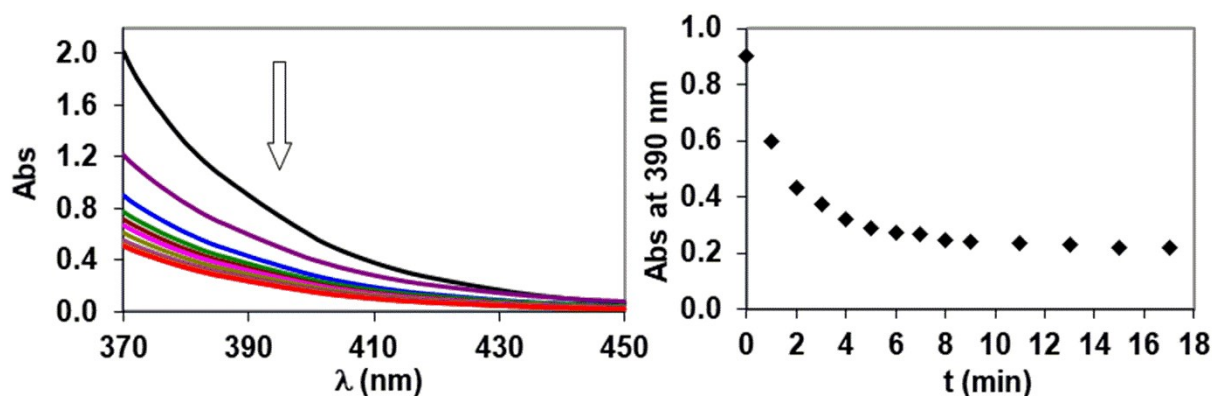

**Figure S9.** Absorption spectra and absorbance values of the Fe(CDTA)<sup>-</sup> – ascorbic acid reacting system ([Fe(CDTA)<sup>-</sup>]= $2.0 \times 10^{-3}$  M, [ascorbic acid]=0.02 M, pH=7.40, [HEPES]=0.01 M, 0.15 M NaNO<sub>3</sub>, 298 K).

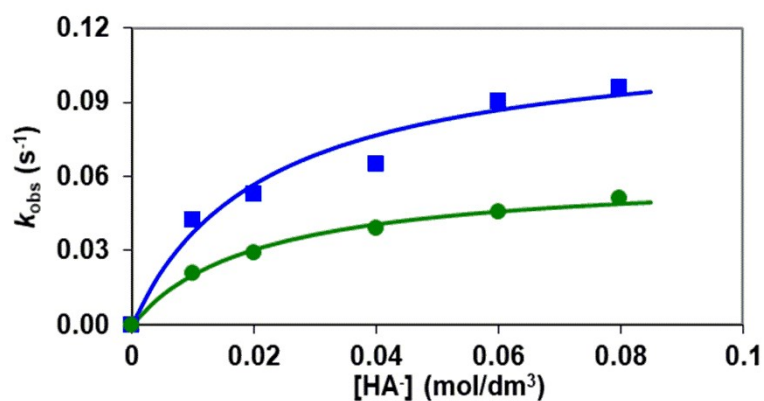



**Figure S10.**  $k_{\text{obs}}$  pseudo-first-order rate constant characterizing the reduction of **Fe(EDTA)<sup>-</sup>** (●) and **Fe(CDTA)<sup>-</sup>** (⊗) by ascorbic acid. Solid lines and the open symbols represent the calculated and measured  $k_{\text{d}}$  rate constants. ( $[\text{Fe}^{\text{III}}\text{L}]=2.0\times 10^{-3}$  M,  $[\text{HEPES}]=0.01$  M, 0.15 M  $\text{NaNO}_3$ , 298 K).

The kinetic data in Figure S10 indicates that the  $k_{\text{obs}}$  shows a saturation curve as a function of  $[\text{HA}^-]$ , which might be interpreted by the formation of the reaction intermediate and the rate determining transformation of the intermediate to the final product. By taking into account the protonation constants of ascorbic acid ( $\log K_1^{\text{H}}=11.34$ ,  $\log K_2^{\text{H}}=4.04$ , 0.1 M  $\text{KNO}_3$ , 298 K),<sup>26</sup> the monohydrogenascorbate  $\text{HA}^-$  species dominates in our experimental conditions (pH=7.4, 298 K, 0.15 M  $\text{NaNO}_3$ ). According to the kinetic data, the electron-transfer might occur by the formation of the ternary  $\text{Fe}^{\text{III}}\text{L-HA}$  intermediate between the ascorbate anion ( $\text{HA}^-$ ) and the  $\text{Fe}^{\text{III}}\text{L}$  complex (Eq. (S20)) replacing the inner-sphere water molecule ( $\{\text{Fe}^{\text{III}}\text{L-HA}\}$ , Eq. (S19)). The  $\text{Fe}^{\text{III}}\text{L}$  might also react rapidly with the radical (Eq. (S21)) formed in the previous step. The presence of free radicals in the oxidation of ascorbic acid was confirmed by EPR measurements.<sup>27</sup>

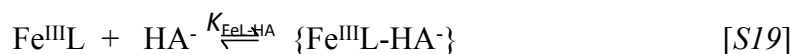

$$K_{\text{FeL-HA}} = \frac{[\{\text{Fe}^{\text{III}}\text{L-HA}\}]}{[\text{Fe}^{\text{III}}\text{L}][\text{HA}^-]}$$

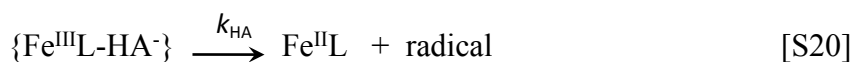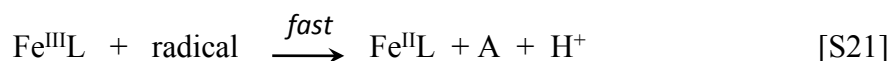

By taking into account all possible pathways and Eq. (S18), the rate of the reduction of  $\text{Fe(EDTA)}^-$  and  $\text{Fe(CDTA)}^-$  with ascorbic acid can be expressed by Eq. (S22).

$$-\frac{d[\text{FeL}]_t}{dt} = k_{\text{obs}}[\text{FeL}]_t = k_{\text{HA}}[\text{Fe}^{\text{III}}\text{L-HA}] \quad [\text{S22}]$$

Considering the total concentration of the  $\text{Fe}^{\text{III}}\text{L}$  ( $[\text{FeL}]_t=[\text{FeL}]+[\text{FeLH}_{-1}]+[\text{Fe}^{\text{III}}\text{L-HA}]$ ), the formation of  $\text{FeLH}_{-1}$  species (Eq. (S6)) and the ternary  $\text{Fe}^{\text{III}}\text{L-HA}$  intermediate (Eq. (S19)), the  $k_{\text{obs}}$  pseudo-first-order rate constants presented can be expressed by Eq. (S23).

$$k_{\text{obs}} = \frac{k[\text{HA}^-]}{1 + K_{\text{FeL-HA}}[\text{HA}^-] + (K_{\text{FeLH}_{-1}}[\text{H}^+])^{-1}} \quad [\text{S23}]$$

where  $k=k_{\text{HA}}K_{\text{FeL-HA}}$  and  $K_{\text{FeL-HA}}$  are the rate and the equilibrium constants characterize the ascorbate anion assisted reduction of the Fe<sup>III</sup>-complexes and the formation of the ternary Fe<sup>III</sup>L-HA intermediate, respectively. The  $k_{\text{HA}}$  and  $K_{\text{FeL-HA}}$  values of Fe(EDTA)<sup>-</sup> and Fe(CDTA)<sup>-</sup> complexes have been calculated by fitting of the kinetic data (Figure S10) to Eq. (S23).

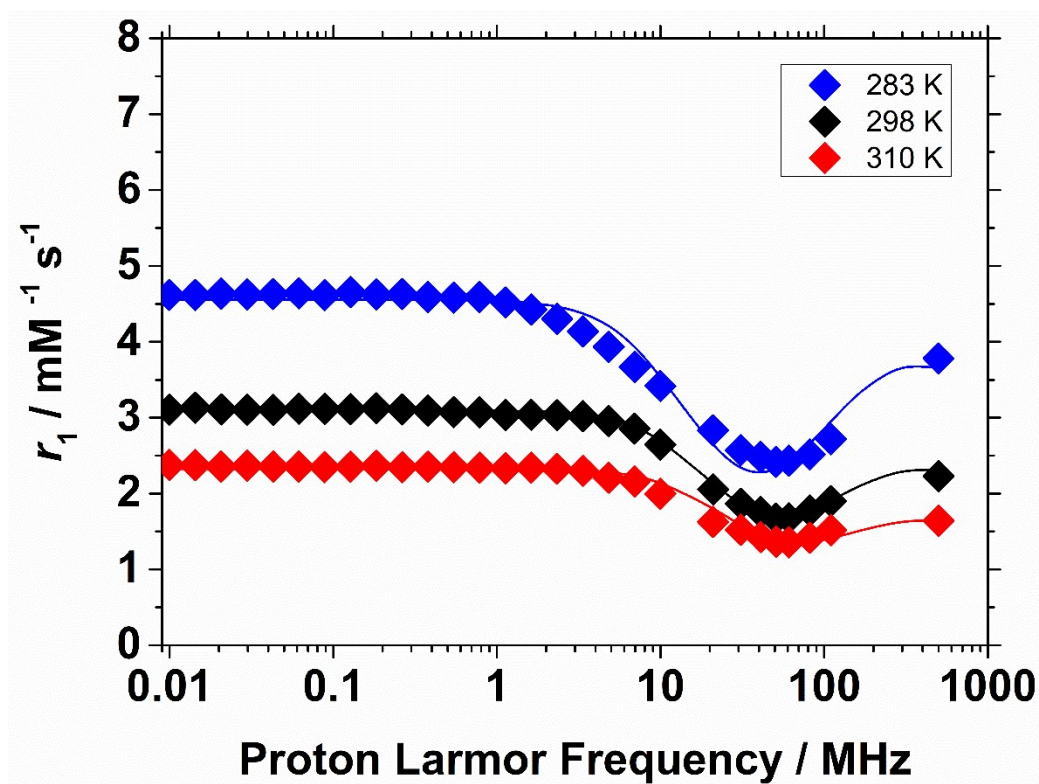

Figure S11.  $^1\text{H}$  NMRD profiles of  $\text{Fe}(\text{CDTA})^-$  (4.87 mM; pH = 6.9) at 283 (◆), 298 (◆) and 310 K (◆).

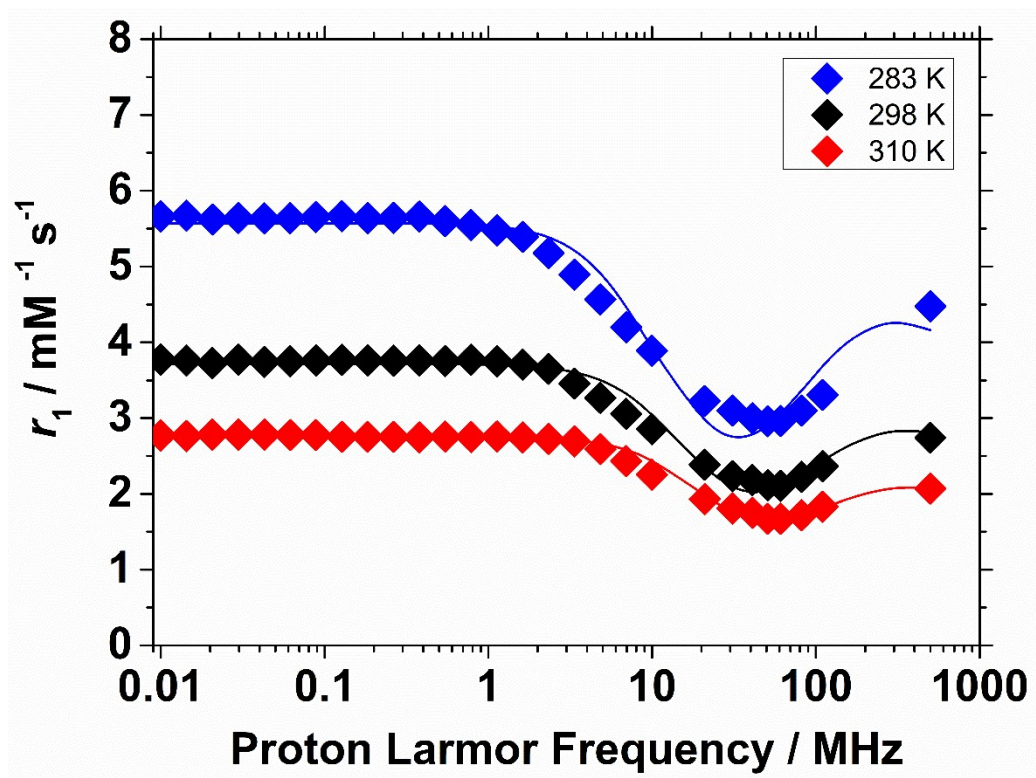

Figure S12.  $^1\text{H}$  NMRD profiles of  $\text{Fe}(\text{EDTA})^-$  (8.98 mM; pH = 5.3) at 283 (◆), 298 (◆) and 310 K (◆).

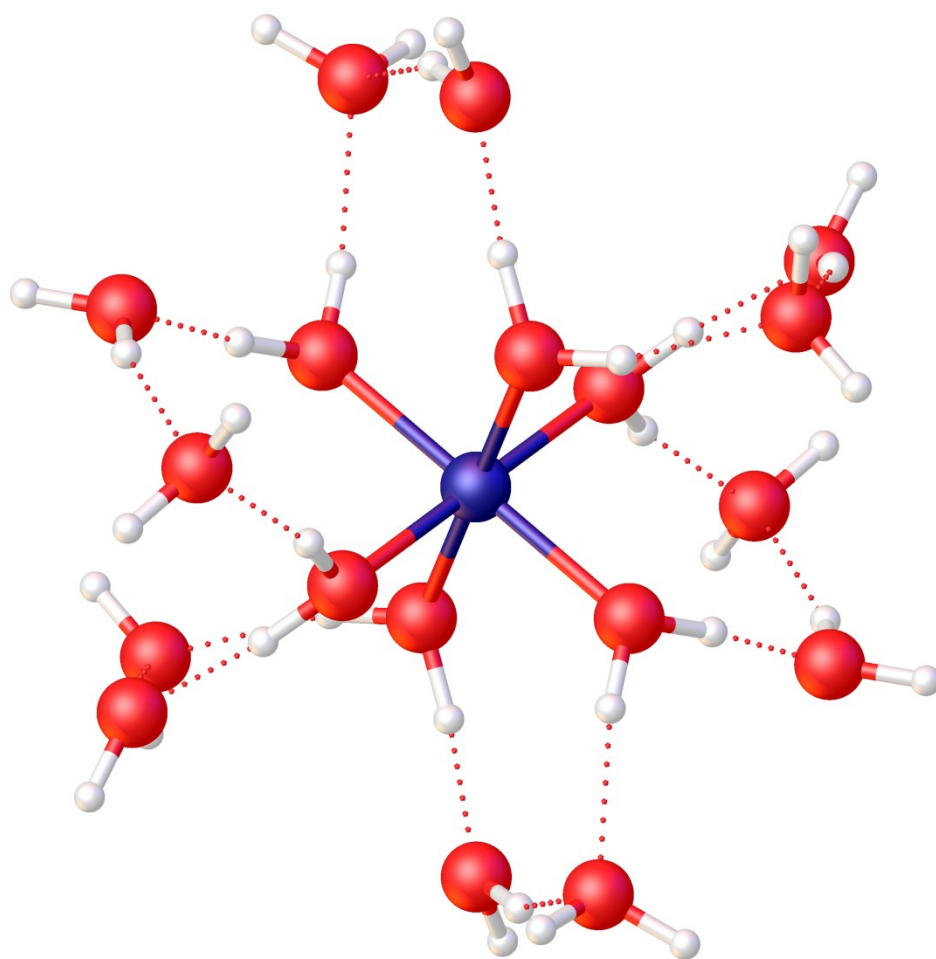

**Figure S13.** Structure of the  $[\text{Fe}(\text{H}_2\text{O})_6]^{3+} \cdot 12\text{H}_2\text{O}$  system optimized at the TPSSh/Def2-TZVP level. The Fe-O bond distance is 2.031 Å.

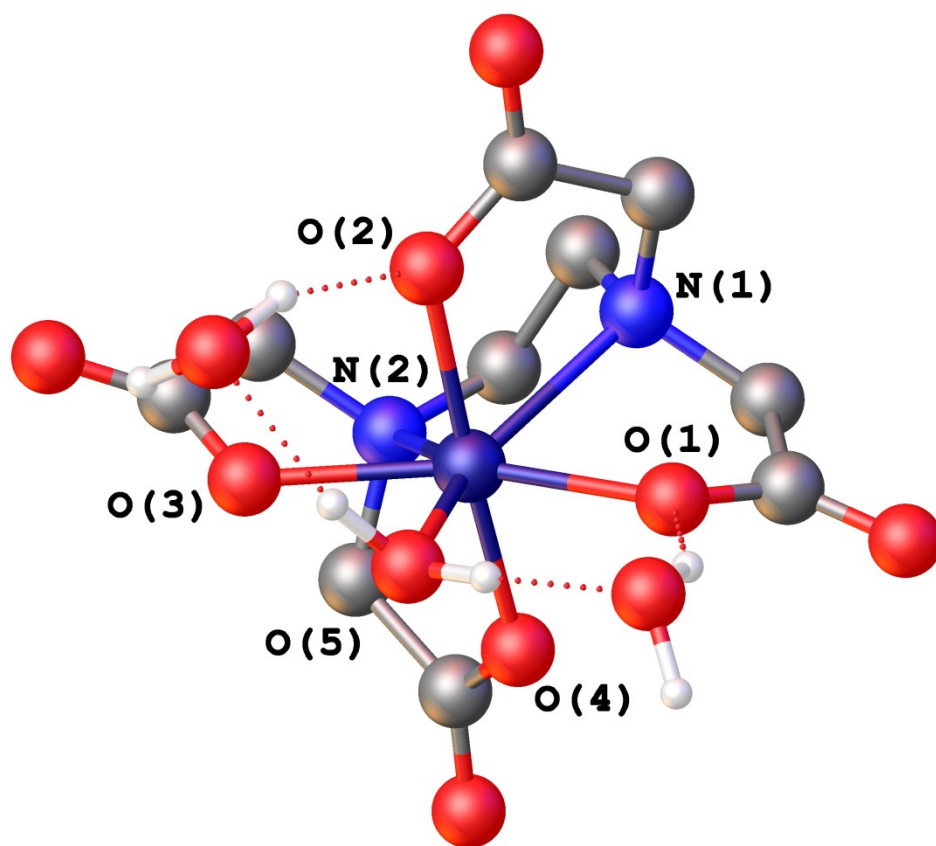

**Figure S14.** Structure of the  $[\text{Fe}(\text{EDTA})(\text{H}_2\text{O})]^- \cdot 2\text{H}_2\text{O}$  (CT) system optimized at the TPSSh/Def2-TZVP level.

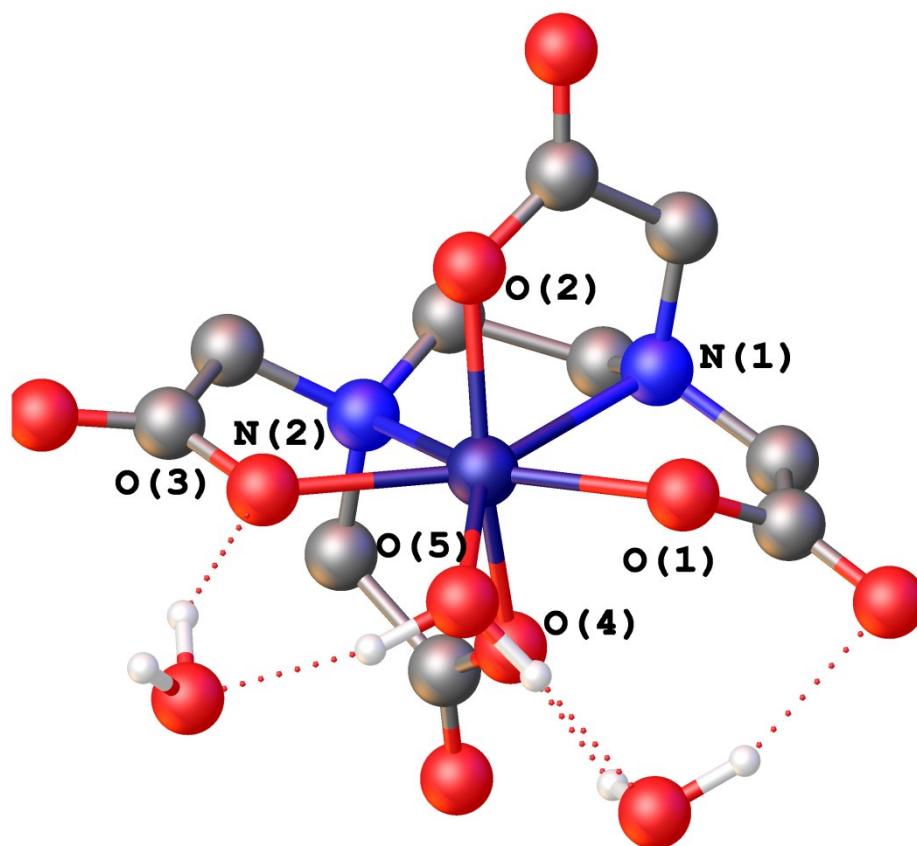

**Figure S15.** Structure of the  $[\text{Fe}(\text{EDTA})(\text{H}_2\text{O})] \cdot 2\text{H}_2\text{O}$  (PB) system optimized at the TPSSh/Def2-TZVP level.

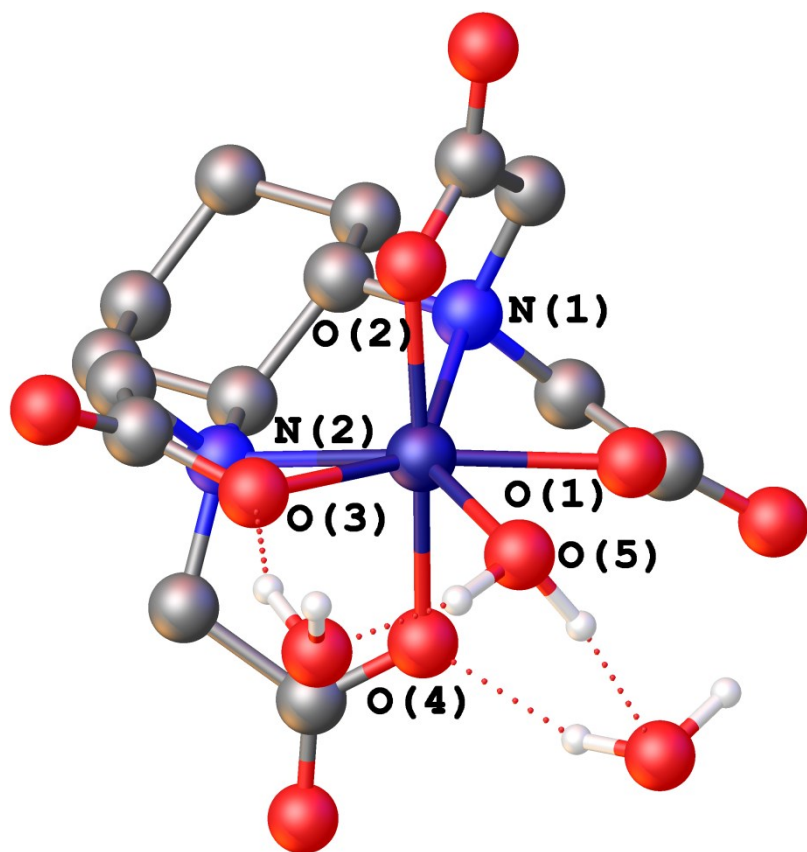

**Figure S16.** Structure of the  $[\text{Fe}(\text{CDTA})(\text{H}_2\text{O})] \cdot 2\text{H}_2\text{O}$  (CT) system optimized at the TPSSh/Def2-TZVP level.



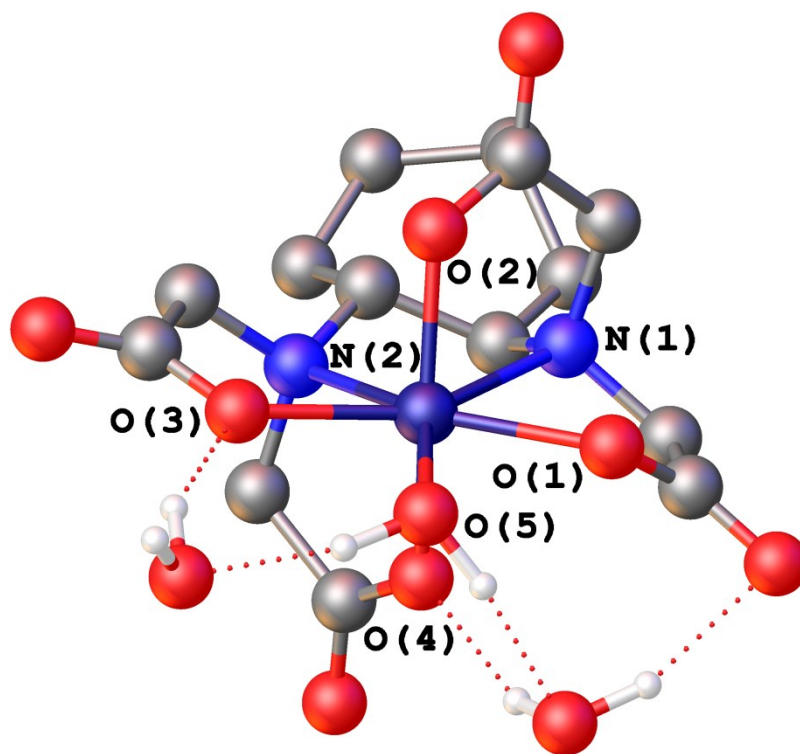

**Figure S17.** Structure of the  $[\text{Fe}(\text{CDTA})(\text{H}_2\text{O})] \cdot 2\text{H}_2\text{O}$  (PB) system optimized at the TPSSh/Def2-TZVP level.

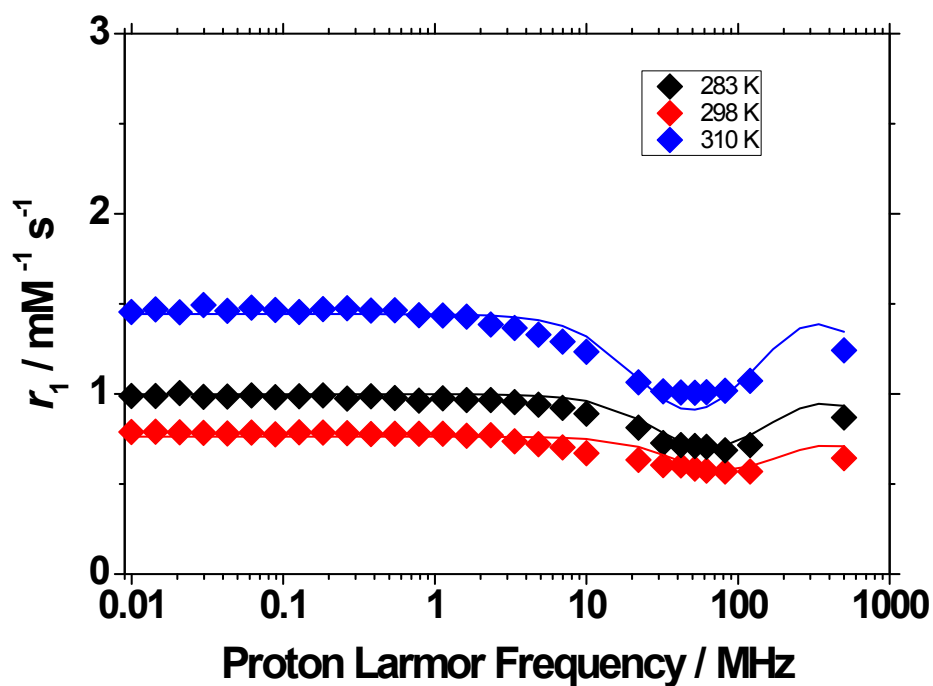

**Figure S18.**  $^1\text{H}$  NMRD profiles at different temperatures (283 (blue), 298 (black) and 310 K (red)) of  $\text{Fe}(\text{DTPA})^{2-}$ ;  $[\text{Fe}^{3+}] = 5.31 \text{ mM}$ , pH 7.08.

### Equations used for the analysis of $^{17}\text{O}$ NMR and NMRD data

Reduced  $^{17}\text{O}$  NMR chemical shifts of aqueous solutions of the Fe(III) complexes,  $\Delta\omega_r$ , were determined from the angular frequencies of the paramagnetic solutions  $\omega$  and of the acidified water  $\omega_A$  (Eq (S24)):

$$\Delta\omega_r = \frac{1}{P_m}(\omega - \omega_A) = \frac{\Delta\omega_m}{(1 + \tau_m T_{2m}^{-1})^2 + \tau_m^2 \Delta\omega_m^2} + \Delta\omega_{os} \quad [\text{S24}]$$

Similarly, the reduced transverse relaxation rates,  $1/T_{2r}$  and were obtained from the measured  $^{17}\text{O}$  NMR relaxation rates of the paramagnetic solutions  $1/T_2$  and of the acidified water reference  $1/T_{2A}$ :

$$\frac{1}{T_{2r}} = \frac{1}{P_m} \left[ \frac{1}{T_2} - \frac{1}{T_{2A}} \right] = \frac{1}{\tau_m} \frac{T_{2m}^{-2} + \tau_m^{-1} T_{2m}^{-1} + \Delta\omega_m^2}{(\tau_m^{-1} + T_{2m}^{-1})^2 + \Delta\omega_m^2} + \frac{1}{T_{2OS}} \quad [\text{S25}]$$

In these equations  $1/T_{2m}$  is the relaxation rate of water molecules coordinated to the Fe(III) ion and  $\Delta\omega_m$  is the chemical shift difference between bound and bulk water, while  $P_m$  is the mole fraction of the bound water and  $\tau_m$  represents the mean residence time of a water molecule in the first coordination sphere of Fe(III) ( $\tau_m = 1/k_{ex}$ ).<sup>28,29</sup>

$\Delta\omega_m$  is dominated by the scalar mechanism, which is determined by the hyperfine or scalar coupling constant,  $A/\hbar$ :

$$\Delta\omega_m = \frac{g_L \mu_B S(S+1)B}{3k_B T} \frac{A}{\hbar} \quad [\text{S26}]$$

In Eq [3]  $B$  is the magnetic field strength,  $S$  represents the electron spin ( $S = 5/2$  for high-spin Fe(III) complex) and  $g_L$  is the isotropic Landé  $g$  factor.<sup>30</sup> The outer sphere contributions to the  $^{17}\text{O}$  chemical shifts was neglected for Fe(EDTA) $^-$  and Fe(CDTA) $^-$ , while for  $[\text{Fe}(\text{H}_2\text{O})]^{3+}$  we included an outer-sphere contribution given by:

$$\Delta\omega_{OS} = C_{OS} \Delta\omega_m \quad [\text{S27}]$$

The water exchange rate is assumed to follow an Eyring behaviour with temperature according to Eq [5], where  $\Delta S^\ddagger$  and  $\Delta H^\ddagger$  are the activation entropy and enthalpy, respectively, and  $k_{ex}^{298}$  is the water exchange rate at 298.15 K:

$$\frac{1}{\tau_m} = k_{ex} = \frac{k_B T}{h} \exp \left\{ \frac{\Delta S^\ddagger}{R} - \frac{\Delta H^\ddagger}{RT} \right\} = \frac{k_{ex}^{298} T}{298.15} \exp \left\{ \frac{\Delta H^\ddagger}{R} \left( \frac{1}{298.15} - \frac{1}{T} \right) \right\} \quad [S28]$$

Transverse relaxation rates were approximated using the scalar contribution,  $1/T_{2sc}$ , as given by Eqs (S29) and (S30), where  $T_{1e}$  is the longitudinal electronic relaxation time.

$$\frac{1}{T_{2m}} \cong \frac{1}{T_{2sc}} = \frac{S(S+1)}{3} \left( \frac{A}{h} \right)^2 \tau_{S1} \quad [S29]$$

$$\frac{1}{\tau_{S1}} = \frac{1}{\tau_m} + \frac{1}{T_{1e}} \quad [S30]$$

The observed  $^1\text{H}$  longitudinal proton relaxation rate ( $R_1^{obs}$ ) contains both paramagnetic and diamagnetic contributions, and relates to  $^1\text{H}$  relaxivity  $r_{1p}$  as shown in Eq (S31):

$$R_1^{obs} = R_1^d + R_1^p = R_1^d + r_{1p}[Fe(III)] \quad [S31]$$

$r_{1p}$  receives both inner- and outer-sphere contributions:

$$r_1 = r_{1is} + r_{1os} \quad [S32]$$

The inner-sphere contribution is directly proportional to the number of coordinated water molecules  $q$ :<sup>31</sup>

$$r_{1is} = \frac{1}{1000} \times \frac{q}{55.55} \times \frac{1}{T_{1m}^H + \tau_m} \quad [S33]$$

The longitudinal relaxation rate of proton nuclei of an inner-sphere water molecule,  $1/T_{1m}^H$  can be expressed as:

$$\frac{1}{T_{1m}^H} = \frac{2}{15} \left( \frac{\mu_0}{4\pi} \right)^2 \frac{\gamma_I^2 g^2 \mu_B^2}{r_{FeH}^6} S(S+1) \left[ \frac{3\tau_{d1}}{1 + \omega_I^2 \tau_{d1}^2} + \frac{7\tau_{d2}}{1 + \omega_S^2 \tau_{d2}^2} \right] \quad [S34]$$

$$\frac{1}{\tau_{di}} = \frac{1}{\tau_m} + \frac{1}{\tau_R} + \frac{1}{T_{ie}} \quad i = 1, 2 \quad [S35]$$

where  $r_{\text{FeH}}$  is the effective distance between the electron charge of Fe(III) and the  $^1\text{H}$  nucleus,  $\omega_I$  is the proton resonance frequency and  $\omega_S$  is the Larmor frequency of the electron spin of Fe(III).

The longitudinal and transverse relaxation rates of the electron spin,  $1/T_{1e}$  and  $1/T_2$ , were approximated by Eqs. (36) – (38),<sup>32</sup> where  $\Delta^2$  is the mean square zero-field-splitting energy,  $\tau_V$  is the electronic correlation time for the modulation of the zero-field-splitting interaction and  $E_V$  the corresponding activation energy.

$$\frac{1}{T_{1e}} = \frac{1}{25} \Delta^2 \tau_V \{4S(S+1) - 3\} \left\{ \frac{1}{1 + \omega_S^2 \tau_V^2} + \frac{4}{1 + 4\omega_S^2 \tau_V^2} \right\} \quad [\text{S36}]$$

$$\frac{1}{T_{2e}} = \left( \left( 0.02 \times (4S^2 + 4S - 3) \right) \tau_V \times \Delta^2 \times \left( \frac{5}{1 + \omega_S^2 \tau_V^2} \right) \right) + \left( \frac{2}{1 + 4\omega_S^2 \tau_V^2} + 3 \right) \quad [\text{S37}]$$

$$\tau_V = \tau_V^{298} \exp \left\{ \frac{E_V}{R} \left( \frac{1}{T} - \frac{1}{298.15} \right) \right\} \quad [\text{S38}]$$

The zero field splitting energy was assumed to follow an Arrhenius behaviour with temperature with an activation energy  $E_\Delta$ :

$$\Delta = \Delta^{298} \exp \left\{ \frac{E_\Delta}{R} \left( \frac{1}{298.15} - \frac{1}{T} \right) \right\} \quad [\text{S39}]$$

The outer-sphere contribution to relaxivity was described as in Eqs (40) – (41), where  $N_A$  is the Avogadro number, and  $J_{OS}$  is the associated spectral density function.<sup>33,34</sup>

$$r_{1os} = \frac{32N_A \pi (\mu_0)^2 \hbar^2 \gamma_S^2 \gamma_I^2}{405 (4\pi)^2 a_{\text{FeH}} D_{\text{FeH}}} S(S+1) [3J_{OS}(\omega_I; T_{1e}) + 7J_{OS}(\omega_S; T_{2e})] \quad [\text{S40}]$$

$$J_{OS}(\omega; T_{je}) = \text{Re} \left[ \frac{1 + \frac{1}{4} \left( i\omega \tau_{\text{FeH}} + \frac{\tau_{\text{FeH}}}{T_{je}} \right)^{1/2}}{1 + \left( i\omega \tau_{\text{FeH}} + \frac{\tau_{\text{FeH}}}{T_{je}} \right)^{1/2} + \frac{4}{9} \left( i\omega \tau_{\text{FeH}} + \frac{\tau_{\text{FeH}}}{T_{je}} \right) + \frac{1}{9} \left( i\omega \tau_{\text{FeH}} + \frac{\tau_{\text{FeH}}}{T_{je}} \right)^{3/2}} \right] \quad [\text{S41}]$$

$$\tau_{FeH} = \frac{a_{FeH}^2}{D_{FeH}}$$

The relative diffusion of the Fe(III) complex and water protons,  $D_{FeH}$ , is assumed to follow an exponential behavior with an activation energy  $E_{FeH}$  and a diffusion coefficient at 298.15 K  $D_{FeH}^{298}$ :

$$D_{FeH} = D_{FeH}^{298} \exp\left\{\frac{E_{FeH}}{R}\left(\frac{1}{298.15} - \frac{1}{T}\right)\right\} \quad [S42]$$

**Table S2.** Calculated  $r_{\text{FeO}}$  and  $r_{\text{FeH}}$  distances and hyperfine coupling constants ( $A_{\text{O}}/\hbar$  and  $A_{\text{H}}/\hbar$ ) obtained with DFT calculations and ZFS parameters obtained with CASSF/NEVPT2 calculations.<sup>[a]</sup>

| Isomer                                              | [Fe(H <sub>2</sub> O) <sub>6</sub> ] <sup>3+</sup> ·12H <sub>2</sub> O | Fe(EDTA) <sup>-</sup> |        | Fe(CDTA) <sup>-</sup> |        |
|-----------------------------------------------------|------------------------------------------------------------------------|-----------------------|--------|-----------------------|--------|
|                                                     |                                                                        | CTP                   | PB     | CTP                   | PB     |
| $r_{\text{FeH}}$ [Å]                                | 2.688                                                                  | 2.690                 | 2.714  | 2.704                 | 2.719  |
| $r_{\text{FeO}}$ [Å]                                | 2.031                                                                  | 2.173                 | 2.204  | 2.192                 | 2.212  |
| $A_{\text{O}}/\hbar$ [ $10^6$ rad s <sup>-1</sup> ] | -99.2                                                                  | -64.8                 | -59.4  | -62.9                 | -58.5  |
| $A_{\text{H}}/\hbar$ [ $10^6$ rad s <sup>-1</sup> ] | 8.69                                                                   | 0.43                  | -0.52  | -0.05                 | -0.66  |
| $D$ [cm <sup>-1</sup> ]                             | 0.01466                                                                | -0.1354               | 0.1446 | -0.1415               | 0.1471 |
| $E$ [cm <sup>-1</sup> ]                             | $1.14 \times 10^{-4}$                                                  | -0.0279               | 0.0407 | 0.0339                | 0.0426 |
| $\Delta$ [cm <sup>-1</sup> ]                        | 0.036                                                                  | 0.117                 | 0.131  | 0.125                 | 0.134  |
| $\Delta^2$ [ $10^{20}$ s <sup>-2</sup> ]            | 0.051                                                                  | 4.89                  | 6.1    | 5.6                   | 6.4    |

<sup>[a]</sup> CTP and PB denote the capped trigonal prismatic and pentagonal bipyramidal isomers, respectively.

**Table S3.** Parameters obtained from the simultaneous fit of <sup>1</sup>H NMRD data.<sup>[a]</sup>

|                                                                 | Fe(DTPA) <sup>2-</sup> |
|-----------------------------------------------------------------|------------------------|
| <sup>298</sup> $r_1$ 20 MHz [mM <sup>-1</sup> s <sup>-1</sup> ] | 0.81                   |
| <sup>298</sup> $\Delta^2$ [ $10^{20}$ s <sup>-2</sup> ]         | $3.9 \pm 0.1$          |
| $E_{\Delta}$ [kJ mol <sup>-1</sup> ]                            | $8.1 \pm 2.5$          |
| <sup>298</sup> $\tau_v$ [ps]                                    | $3.4 \pm 0.9$          |
| $E_v$ [kJ mol <sup>-1</sup> ]                                   | 1.0 <sup>[a]</sup>     |
| <sup>298</sup> $D$ [ $10^5$ cm <sup>2</sup> s <sup>-1</sup> ]   | 2.24 <sup>[a]</sup>    |
| $E_D$ [kJ mol <sup>-1</sup> ]                                   | 20.0 <sup>[a]</sup>    |
| $q$                                                             | 0 <sup>[a]</sup>       |
| $a_{\text{FeH}}$ [Å]                                            | 3.5 <sup>[a]</sup>     |

<sup>[a]</sup> parameters fixed during the fitting procedure.

**Table S4.** Bond distances [ $\text{\AA}$ ] of the metal coordination environment obtained with DFT calculations (TPSSH/Def2-TZVP).<sup>[a]</sup>

|         | [Fe(EDTA)(H <sub>2</sub> O)]·2H <sub>2</sub> O |               | [Fe(CDTA)(H <sub>2</sub> O)]·2H <sub>2</sub> O |       |
|---------|------------------------------------------------|---------------|------------------------------------------------|-------|
|         | CT                                             | PB            | CT                                             | PB    |
| Fe-N(1) | 2.318                                          | 2.388 (2.309) | 2.331 (2.317)                                  | 2.392 |
| Fe-N(2) | 2.326                                          | 2.347 (2.313) | 2.321 (2.273)                                  | 2.360 |
| Fe-O(1) | 2.125                                          | 2.081 (2.075) | 2.075 (2.096)                                  | 2.081 |
| Fe-O(2) | 2.042                                          | 1.966 (1.984) | 1.990 (1.973)                                  | 1.965 |
| Fe-O(3) | 2.085                                          | 2.100 (2.093) | 2.108 (2.074)                                  | 2.096 |
| Fe-O(4) | 1.993                                          | 1.999 (1.992) | 2.039 (2.011)                                  | 1.995 |
| Fe-O(5) | 2.173                                          | 2.204 (2.083) | 2.192 (2.141)                                  | 2.212 |

<sup>[a]</sup> Data in parenthesis observed in the X-ray Crystal structures, refs. 22 and 35.

**Table S5.** Optimized Cartesian coordinates obtained for [Fe(H<sub>2</sub>O)<sub>6</sub>]<sup>3+</sup>·12H<sub>2</sub>O with DFT calculations (0 imaginary frequencies).

| Center Number | Atomic Number | Coordinates (Angstroms) |           |           |
|---------------|---------------|-------------------------|-----------|-----------|
|               |               | X                       | Y         | Z         |
| 1             | 8             | 1.609269                | -0.420218 | -1.164838 |
| 2             | 1             | 2.011705                | 0.249528  | -1.767369 |
| 3             | 8             | -0.441270               | 1.604039  | -1.164573 |
| 4             | 1             | -0.334404               | 2.545797  | -0.792561 |
| 5             | 8             | -1.169000               | -1.183315 | -1.164739 |
| 6             | 1             | -2.037824               | -1.561924 | -0.792464 |
| 7             | 8             | 0.440859                | -1.603935 | 1.164444  |
| 8             | 1             | 1.222252                | -1.617770 | 1.766786  |
| 9             | 8             | 1.168640                | 1.183615  | 1.164541  |
| 10            | 1             | 0.790172                | 1.867610  | 1.766639  |
| 11            | 8             | -1.609307               | 0.420296  | 1.165056  |
| 12            | 1             | -2.011662               | -0.249510 | 1.767586  |
| 13            | 1             | 2.371646                | -0.983209 | -0.792565 |
| 14            | 1             | 0.334299                | -2.545590 | 0.792126  |
| 15            | 1             | 2.037973                | 1.561344  | 0.792625  |
| 16            | 1             | -1.222889               | 1.617813  | -1.766675 |
| 17            | 1             | -0.790134               | -1.866791 | -1.767126 |
| 18            | 1             | -2.371769               | 0.983403  | 0.793150  |
| 19            | 8             | 3.276472                | 2.268871  | 0.155440  |
| 20            | 8             | 3.181597                | 1.427958  | -2.564128 |
| 21            | 1             | 3.446330                | 2.122497  | -0.795503 |
| 22            | 1             | 4.126673                | 2.439450  | 0.581451  |
| 23            | 1             | 3.985728                | 1.048221  | -2.951109 |
| 24            | 1             | 2.873945                | 2.075777  | -3.215969 |
| 25            | 8             | 0.355535                | 3.470123  | 2.563336  |
| 26            | 1             | -0.358249               | 3.527657  | 3.216345  |
| 27            | 1             | 1.087031                | 3.976881  | 2.948943  |
| 28            | 8             | 3.604336                | -1.700313 | -0.154696 |
| 29            | 1             | 3.561901                | -1.921933 | 0.795955  |
| 30            | 1             | 4.178123                | -2.350259 | -0.581050 |
| 31            | 8             | 2.827557                | -2.042546 | 2.563476  |

|    |    |           |                       |           |
|----|----|-----------|-----------------------|-----------|
| 32 | 1  | 2.900793  | -2.929518             | 2.948837  |
| 33 | 1  | 3.234268  | -1.453 <sup>255</sup> | 3.216573  |
| 34 | 8  | 0.328847  | -3.971758             | 0.154109  |
| 35 | 1  | 0.116173  | -4.045768             | -0.796632 |
| 36 | 1  | 0.052844  | -4.793745             | 0.580234  |
| 37 | 8  | -0.354688 | -3.469145             | -2.564180 |
| 38 | 1  | -1.085843 | -3.975811             | -2.950550 |
| 39 | 1  | 0.359539  | -3.526219             | -3.216740 |
| 40 | 8  | -3.275476 | -2.270435             | -0.154844 |
| 41 | 1  | -4.125501 | -2.441617             | -0.580972 |
| 42 | 1  | -3.445725 | -2.123772             | 0.796010  |
| 43 | 8  | -3.181748 | -1.428411             | 2.564357  |
| 44 | 1  | -2.874016 | -2.075392             | 3.216991  |
| 45 | 1  | -3.986370 | -1.048856             | 2.950491  |
| 46 | 8  | -3.604660 | 1.700761              | 0.155859  |
| 47 | 1  | -3.562778 | 1.921972              | -0.794868 |
| 48 | 1  | -4.178205 | 2.350923              | 0.582211  |
| 49 | 8  | -2.828014 | 2.041920              | -2.563212 |
| 50 | 1  | -3.234689 | 1.452089              | -3.215848 |
| 51 | 1  | -2.901643 | 2.928614              | -2.949151 |
| 52 | 8  | -0.328637 | 3.972087              | -0.155110 |
| 53 | 1  | -0.115955 | 4.046439              | 0.795598  |
| 54 | 1  | -0.053467 | 4.794266              | -0.581405 |
| 55 | 26 | -0.000106 | 0.000150              | -0.000091 |

-----  
E(UTPSSh) = -2639.4167488 Hartree

Zero-point correction = 0.450061

Thermal correction to Energy = 0.497288

Thermal correction to Enthalpy = 0.498232

Thermal correction to Gibbs Free Energy = 0.366914

Sum of electronic and zero-point Energies = -2638.966688

Sum of electronic and thermal Energies = -2638.919461

Sum of electronic and thermal Enthalpies = -2638.918517

Sum of electronic and thermal Free Energies = -2639.049835



**Table S6.** Optimized Cartesian coordinates obtained for [Fe(EDTA)(H<sub>2</sub>O)]<sup>-</sup>·2H<sub>2</sub>O (capped trigonal prism, CTP) with DFT calculations (0 imaginary frequencies).

| Center Number | Atomic Number | Coordinates (Angstroms) |           |           |
|---------------|---------------|-------------------------|-----------|-----------|
|               |               | X                       | Y         | Z         |
| 1             | 8             | -2.107131               | -0.293884 | -0.607000 |
| 2             | 8             | -3.705478               | -1.794134 | -0.144056 |
| 3             | 8             | -1.150870               | 3.006794  | 2.242724  |
| 4             | 8             | -0.150553               | 1.800196  | 0.644575  |
| 5             | 8             | 0.111959                | -1.727542 | -1.288911 |
| 6             | 8             | 1.366662                | -3.470464 | -1.914920 |
| 7             | 8             | 1.774284                | 0.899950  | -1.051493 |
| 8             | 8             | 3.633078                | 1.877129  | -0.282308 |
| 9             | 7             | 1.737798                | -1.006212 | 0.680562  |
| 10            | 7             | -0.884673               | -0.541482 | 1.656774  |
| 11            | 6             | 1.248921                | -1.745122 | 1.862629  |
| 12            | 1             | 0.827060                | -2.686823 | 1.506744  |
| 13            | 1             | 2.072378                | -1.994020 | 2.540976  |
| 14            | 6             | 0.195333                | -0.936506 | 2.587134  |
| 15            | 1             | 0.630801                | -0.018811 | 2.986543  |
| 16            | 1             | -0.205783               | -1.502314 | 3.435026  |
| 17            | 6             | -1.837155               | -1.619881 | 1.347979  |
| 18            | 1             | -1.290273               | -2.537662 | 1.124089  |
| 19            | 1             | -2.512279               | -1.821729 | 2.185511  |
| 20            | 6             | -2.642449               | -1.233056 | 0.107402  |
| 21            | 6             | -1.584826               | 0.655920  | 2.162754  |
| 22            | 1             | -2.603608               | 0.668719  | 1.771270  |
| 23            | 1             | -1.649028               | 0.647627  | 3.253933  |
| 24            | 6             | -0.917613               | 1.941308  | 1.682869  |
| 25            | 6             | 2.283563                | -1.935657 | -0.325874 |
| 26            | 1             | 2.998918                | -1.402120 | -0.954241 |
| 27            | 1             | 2.809563                | -2.770354 | 0.145253  |
| 28            | 6             | 1.184674                | -2.454391 | -1.250720 |
| 29            | 6             | 2.687181                | 0.073818  | 0.985517  |
| 30            | 1             | 2.341312                | 0.629525  | 1.859166  |
| 31            | 1             | 3.689042                | -0.308973 | 1.204847  |
| 32            | 6             | 2.733784                | 1.039876  | -0.200006 |
| 33            | 8             | -0.494891               | 1.145357  | -2.228350 |
| 34            | 1             | -1.456146               | 1.251773  | -2.438197 |
| 35            | 1             | -0.111595               | 2.048383  | -2.112785 |
| 36            | 8             | 0.623809                | 3.556086  | -1.380476 |
| 37            | 8             | -3.204180               | 1.123512  | -2.586366 |
| 38            | 1             | 0.350224                | 3.163093  | -0.521903 |
| 39            | 1             | 1.531884                | 3.228007  | -1.477561 |
| 40            | 1             | -3.475933               | 0.609635  | -3.357840 |
| 41            | 1             | -3.058149               | 0.464947  | -1.862252 |
| 42            | 26            | -0.020856               | 0.056273  | -0.409054 |

·E(UTPSSh) = -2593.5690276 Hartree

Zero-point correction = 0.311580

Thermal correction to Energy = 0.338692

Thermal correction to Enthalpy = 0.339636

Thermal correction to Gibbs Free Energy = 0.253628

Sum of electronic and zero-point Energies = -2593.257448

Sum of electronic and thermal Energies = -2593.230336

Sum of electronic and thermal Enthalpies = -2593.229391

Sum of electronic and thermal Free Energies = -2593.315400

**Table S7.** Optimized Cartesian coordinates obtained for  $[\text{Fe}(\text{EDTA})(\text{H}_2\text{O})] \cdot 2\text{H}_2\text{O}$  (pentagonal bipyramidal, PB) with DFT calculations (0 imaginary frequencies).

| Center Number | Atomic Number | Coordinates (Angstroms) |           |           |
|---------------|---------------|-------------------------|-----------|-----------|
|               |               | X                       | Y         | Z         |
| 1             | 7             | -1.025765               | -1.176545 | 1.194446  |
| 2             | 7             | 1.737167                | -1.061370 | 0.508816  |
| 3             | 8             | -0.458060               | 1.932847  | -1.724678 |
| 4             | 8             | -2.147129               | 0.213923  | -0.727086 |
| 5             | 8             | 1.752589                | 0.883140  | -1.191115 |
| 6             | 8             | 3.598140                | 1.879907  | -0.424876 |
| 7             | 8             | -4.119637               | -0.826740 | -0.573407 |
| 8             | 6             | 2.749745                | 0.979235  | -0.388472 |
| 9             | 8             | 0.082406                | 1.333684  | 1.131803  |
| 10            | 6             | -2.928407               | -0.722871 | -0.290846 |
| 11            | 8             | -0.004263               | -1.462968 | -1.589264 |
| 12            | 8             | -0.465635               | 1.773336  | 3.253551  |
| 13            | 6             | -0.504878               | 1.059233  | 2.258365  |
| 14            | 8             | 1.067368                | -3.289061 | -2.297302 |
| 15            | 6             | 0.969907                | -2.318659 | -1.552050 |
| 16            | 6             | 2.815488                | -0.082058 | 0.702687  |
| 17            | 6             | -1.338361               | -0.223710 | 2.282157  |
| 18            | 6             | -2.252798               | -1.744454 | 0.612853  |
| 19            | 6             | 2.077738                | -2.054984 | -0.529445 |
| 20            | 6             | 1.304751                | -1.678246 | 1.775187  |
| 21            | 6             | -0.092257               | -2.238669 | 1.622708  |
| 22            | 1             | -1.979998               | -2.599439 | -0.008961 |
| 23            | 1             | 3.805348                | -0.550597 | 0.717944  |
| 24            | 1             | 2.931035                | -1.685995 | -1.102102 |
| 25            | 1             | -2.951609               | -2.089992 | 1.380402  |
| 26            | 1             | -1.244415               | -0.698105 | 3.262762  |
| 27            | 1             | 1.322706                | -0.906999 | 2.546893  |
| 28            | 1             | 2.378639                | -3.005553 | -0.079514 |
| 29            | 1             | -0.106076               | -3.017890 | 0.859173  |
| 30            | 1             | -0.422197               | -2.693071 | 2.564085  |
| 31            | 1             | 1.994641                | -2.471085 | 2.087777  |
| 32            | 1             | -1.371947               | 2.304362  | -1.690226 |
| 33            | 1             | 0.158078                | 2.625359  | -1.389038 |
| 34            | 1             | -2.377833               | 0.096343  | 2.177735  |
| 35            | 1             | 2.671747                | 0.421745  | 1.659295  |
| 36            | 8             | -3.132816               | 2.568768  | -1.599010 |
| 37            | 1             | -3.558766               | 2.553328  | -2.465901 |
| 38            | 1             | -3.069869               | 1.625312  | -1.316188 |
| 39            | 8             | 1.172464                | 3.667263  | -0.221426 |
| 40            | 1             | 0.847091                | 3.073786  | 0.483633  |
| 41            | 1             | 2.062853                | 3.317634  | -0.415198 |
| 42            | 26            | -0.063009               | 0.158637  | -0.478915 |

E(UTPSSh) = -2593.5693534 Hartree

Zero-point correction = 0.311680

Thermal correction to Energy = 0.338762

Thermal correction to Enthalpy = 0.339706

Thermal correction to Gibbs Free Energy = 0.253915

Sum of electronic and zero-point Energies = -2593.257674

Sum of electronic and thermal Energies = -2593.230591

Sum of electronic and thermal Enthalpies = -2593.229647

Sum of electronic and thermal Free Energies = -2593.315439

**Table S8.** Optimized Cartesian coordinates obtained for [Fe(CDTA)(H<sub>2</sub>O)]·2H<sub>2</sub>O (capped trigonal prism, CTP) with DFT calculations (0 imaginary frequencies).

| Center Number | Atomic Number | Coordinates (Angstroms) |           |           |
|---------------|---------------|-------------------------|-----------|-----------|
|               |               | X                       | Y         | Z         |
| 1             | 8             | 1.704482                | -1.751555 | 0.631912  |
| 2             | 8             | 1.164806                | -3.756698 | 1.470349  |
| 3             | 8             | 1.082781                | -0.781577 | -3.676991 |
| 4             | 8             | 1.160803                | 0.270674  | -1.703233 |
| 5             | 8             | 0.481911                | 0.067554  | 2.256816  |
| 6             | 8             | -0.537498               | 0.961070  | 4.035434  |
| 7             | 8             | 1.191623                | 2.234134  | 0.191315  |
| 8             | 8             | 0.558623                | 3.937879  | -1.108021 |
| 9             | 7             | -1.156870               | 1.218001  | 0.493886  |
| 10            | 7             | -0.586260               | -1.363187 | -0.531484 |
| 11            | 6             | -2.272594               | 0.245774  | 0.311614  |
| 12            | 1             | -2.337044               | -0.299255 | 1.259542  |
| 13            | 6             | -1.926104               | -0.752326 | -0.788208 |
| 14            | 1             | -1.813193               | -0.201034 | -1.727961 |
| 15            | 6             | -0.569711               | -2.440421 | 0.474328  |
| 16            | 1             | -1.135979               | -2.127753 | 1.353993  |
| 17            | 1             | -1.005645               | -3.370282 | 0.099958  |
| 18            | 6             | 0.871490                | -2.704110 | 0.910278  |
| 19            | 6             | 0.014570                | -1.815542 | -1.803836 |
| 20            | 1             | 0.724040                | -2.619940 | -1.601878 |
| 21            | 1             | -0.739710               | -2.209035 | -2.488945 |
| 22            | 6             | 0.801455                | -0.700948 | -2.486263 |
| 23            | 6             | -1.162738               | 1.754783  | 1.869410  |
| 24            | 1             | -0.679943               | 2.733216  | 1.875101  |
| 25            | 1             | -2.179692               | 1.886600  | 2.246619  |
| 26            | 6             | -0.368665               | 0.864888  | 2.823038  |
| 27            | 6             | -1.084457               | 2.297583  | -0.505084 |
| 28            | 1             | -1.261721               | 1.888689  | -1.501443 |
| 29            | 1             | -1.821856               | 3.085475  | -0.327332 |
| 30            | 6             | 0.322021                | 2.898698  | -0.488740 |
| 31            | 8             | 3.072103                | 0.556948  | 0.538848  |
| 32            | 1             | 3.663623                | -0.233024 | 0.484058  |
| 33            | 1             | 3.309627                | 1.161840  | -0.203049 |
| 34            | 8             | 3.294401                | 2.074121  | -1.827768 |
| 35            | 8             | 4.377314                | -1.853080 | 0.534094  |
| 36            | 1             | 2.564042                | 1.453852  | -2.045365 |
| 37            | 1             | 2.814344                | 2.851270  | -1.497896 |
| 38            | 1             | 4.816543                | -2.039923 | 1.373899  |
| 39            | 1             | 3.426474                | -2.087740 | 0.670446  |
| 40            | 26            | 0.923664                | 0.180868  | 0.319736  |
| 41            | 6             | -3.630709               | 0.911535  | 0.043638  |
| 42            | 1             | -3.564682               | 1.507416  | -0.872310 |
| 43            | 1             | -3.871527               | 1.598694  | 0.859007  |
| 44            | 6             | -3.049319               | -1.784736 | -0.965508 |
| 45            | 1             | -3.140949               | -2.378348 | -0.050390 |
| 46            | 1             | -2.794872               | -2.474871 | -1.774177 |
| 47            | 6             | -4.391784               | -1.105415 | -1.246044 |
| 48            | 6             | -4.740623               | -0.128598 | -0.124156 |
| 49            | 1             | -4.342425               | -0.567407 | -2.199603 |
| 50            | 1             | -5.169100               | -1.867205 | -1.348429 |
| 51            | 1             | -5.685148               | 0.379323  | -0.336181 |
| 52            | 1             | -4.876337               | -0.679573 | 0.813555  |

·E (UTPSSh) = -2749.6849137 Hartree

Zero-point correction = 0.404725  
 Thermal correction to Energy = 0.435239  
 Thermal correction to Enthalpy = 0.436183  
 Thermal correction to Gibbs Free Energy = 0.343475  
 Sum of electronic and zero-point Energies = -2749.280188  
 Sum of electronic and thermal Energies = -2749.249675  
 Sum of electronic and thermal Enthalpies = -2749.248730  
 Sum of electronic and thermal Free Energies = -2749.341438

**Table S9.** Optimized Cartesian coordinates obtained for  $[\text{Fe}(\text{CDTA})(\text{H}_2\text{O})]^- \cdot 2\text{H}_2\text{O}$  (pentagonal bipyramidal, PB) with DFT calculations (0 imaginary frequencies).

| Center Number | Atomic Number | Coordinates (Angstroms) |           |           |
|---------------|---------------|-------------------------|-----------|-----------|
|               |               | X                       | Y         | Z         |
| 1             | 7             | 0.615592                | -1.404821 | 0.510583  |
| 2             | 7             | 1.096552                | 1.332774  | -0.169384 |
| 3             | 8             | -3.092920               | 0.392672  | -0.813080 |
| 4             | 8             | -1.751887               | -1.828667 | -0.562727 |
| 5             | 8             | -1.279151               | 2.112764  | -0.827115 |
| 6             | 8             | -1.222279               | 4.060117  | 0.264065  |
| 7             | 8             | -1.437990               | -4.026948 | -0.816707 |
| 8             | 6             | -0.706407               | 2.990632  | -0.086957 |
| 9             | 8             | -1.213958               | 0.404325  | 1.498780  |
| 10            | 6             | -1.023608               | -2.899365 | -0.557594 |
| 11            | 8             | -0.017137               | -0.219899 | -2.162429 |
| 12            | 8             | -0.912970               | -0.248695 | 3.614026  |
| 13            | 6             | -0.707118               | -0.369078 | 2.411537  |
| 14            | 8             | 1.565588                | 0.330525  | -3.638058 |
| 15            | 6             | 1.024498                | 0.453273  | -2.542947 |
| 16            | 6             | 0.683527                | 2.618273  | 0.413555  |
| 17            | 6             | 0.157300                | -1.529219 | 1.912600  |
| 18            | 6             | 0.442678                | -2.672632 | -0.218894 |
| 19            | 6             | 1.561439                | 1.497410  | -1.561179 |
| 20            | 6             | 2.027491                | 0.593746  | 0.721399  |
| 21            | 6             | 2.000913                | -0.882455 | 0.352266  |
| 22            | 1             | 0.987736                | -2.608108 | -1.163232 |
| 23            | 1             | 1.388372                | 3.426559  | 0.192198  |
| 24            | 1             | 1.202523                | 2.459415  | -1.932744 |
| 25            | 1             | 0.827965                | -3.530512 | 0.338653  |
| 26            | 1             | 0.990068                | -1.668416 | 2.603149  |
| 27            | 1             | 1.591558                | 0.693150  | 1.718599  |
| 28            | 1             | 2.650520                | 1.521681  | -1.626930 |
| 29            | 1             | 2.214579                | -0.984929 | -0.715757 |
| 30            | 1             | -3.685460               | -0.364145 | -0.590165 |
| 31            | 1             | -3.345123               | 1.146944  | -0.231198 |
| 32            | 1             | -0.468761               | -2.421023 | 1.993890  |
| 33            | 1             | 0.625759                | 2.516170  | 1.498268  |
| 34            | 8             | -4.435555               | -1.962255 | -0.313448 |
| 35            | 1             | -4.912147               | -2.290406 | -1.086963 |
| 36            | 1             | -3.491999               | -2.214584 | -0.455496 |
| 37            | 8             | -3.430688               | 2.283682  | 1.254383  |
| 38            | 1             | -2.739295               | 1.712739  | 1.642739  |
| 39            | 1             | -2.923033               | 3.042306  | 0.907496  |
| 40            | 26            | -0.930813               | 0.096148  | -0.451419 |
| 41            | 6             | 3.482390                | 1.135335  | 0.783673  |
| 42            | 1             | 3.774971                | 1.205493  | 1.834802  |
| 43            | 1             | 3.513931                | 2.155218  | 0.391880  |
| 44            | 6             | 3.099015                | -1.623146 | 1.125675  |

|    |   |          |           |           |
|----|---|----------|-----------|-----------|
| 45 | 1 | 3.014223 | -1.387193 | 2.190475  |
| 46 | 1 | 2.979027 | -2.703820 | 1.027118  |
| 47 | 6 | 4.490706 | -1.190891 | 0.612566  |
| 48 | 6 | 4.483235 | 0.240928  | 0.045000  |
| 49 | 1 | 5.205217 | -1.262019 | 1.436286  |
| 50 | 1 | 4.830343 | -1.883429 | -0.161676 |
| 51 | 1 | 5.483252 | 0.676170  | 0.112033  |
| 52 | 1 | 4.237137 | 0.209394  | -1.020637 |

·E(UTPSSh) = -2749.6743768 Hartree  
 Zero-point correction = 0.404298  
 Thermal correction to Energy = 0.435212  
 Thermal correction to Enthalpy = 0.436157  
 Thermal correction to Gibbs Free Energy = 0.341944  
 Sum of electronic and zero-point Energies = -2749.270079  
 Sum of electronic and thermal Energies = -2749.239164  
 Sum of electronic and thermal Enthalpies = -2749.238220  
 Sum of electronic and thermal Free Energies = -2749.332433

## References

- (1) (a) D. F. Evans, *J. Chem. Soc.* **1959**, 2003–2005; (b) D. F. Evans, G. V. Fazakerley, R. F. Phillips, *J. Chem. Soc. (A)* **1971**, 1931–1934; (c) D. M. Corsi, C. P.-Iglesias, H. van Bekkum, J. A. Peters, *Magn. Reson. Chem.* **2001**, *39*, 723–726.
- (2) J. M. Tao, J. P. Perdew, V. N. Staroverov, G. E. Scuseria, *Phys. Rev. Lett.* **2003**, *91*, 146401.
- (3) F. Weigend, R. Ahlrichs, *Phys. Chem. Chem. Phys.* **2005**, *7*, 3297–3305.
- (4) V. Patinec, G. A. Rolla, M. Botta, R. Tripier, D. Esteban-Gómez, C. Platas-Iglesias, *Inorg. Chem.* **2013**, *52*, 11173–11184.
- (5) E. D. Hedegard, J. Kongsted, S. P. A. Sauer, *J. Chem. Theory Comput.* **2011**, *7*, 4077–4087.
- (6) N. Rega, M. Cossi, V. Barone, *J. Chem. Phys.* **1996**, *105*, 11060–11067.
- (7) J. Tomasi, B. Mennucci, R. Cammi, *Chem. Rev.* **2005**, *105*, 2999–3093.
- (8) Gaussian 09, Revision E.01, M. J. Frisch, G. W. Trucks, H. B. Schlegel, G. E. Scuseria, M. A. Robb, J. R. Cheeseman, G. Scalmani, V. Barone, G. A. Petersson, H. Nakatsuji, X. Li, M. Caricato, A. Marenich, J. Bloino, B. G. Janesko, R. Gomperts, B. Mennucci, H. P. Hratchian, J. V. Ortiz, A. F. Izmaylov, J. L. Sonnenberg, D. Williams-Young, F. Ding, F. Lipparini, F. Egidi, J. Goings, B. Peng, A. Petrone, T. Henderson, D. Ranasinghe, V. G. Zakrzewski, J. Gao, N. Rega, G. Zheng, W. Liang, M. Hada, M. Ehara, K. Toyota, R. Fukuda, J. Hasegawa, M. Ishida, T. Nakajima, Y. Honda, O. Kitao, H. Nakai, T. Vreven, K. Throssell, J. A. Montgomery, Jr., J. E. Peralta, F. Ogliaro, M. Bearpark, J. J. Heyd, E. Brothers, K. N. Kudin, V. N. Staroverov, T. Keith, R. Kobayashi, J. Normand, K. Raghavachari, A. Rendell, J. C. Burant, S. S. Iyengar, J. Tomasi, M. Cossi, J. M. Millam, M. Klene, C. Adamo, R. Cammi, J. W. Ochterski, R. L. Martin, K. Morokuma, O. Farkas, J. B. Foresman, and D. J. Fox, Gaussian, Inc., Wallingford CT, 2016.
- (9) (a) B. O. Roos, P. R. Taylor, P. E. M. Siegbahn, *Chem. Phys.* **1980**, *48*(2), 157–173; (b) P. Siegbahn, A. Heiberg, B. Roos, B. Levy, *Phys. Scr.* **1980**, *21* (3–4), 323; (c) P. E. M. Siegbahn, J. Almlöf, A. Heiberg, B. O. Roos, *J. Chem. Phys.* **1981**, *74* (4), 2384–2396.
- (10) (a) F. Neese, Software Update: the ORCA Program System, Version 4.0. *Wiley Interdisciplinary Reviews: Computational Molecular Science* **2018**, *8* (1), e1327; (b) F. Neese, The ORCA Program System. *Wiley Interdisciplinary Reviews: Computational Molecular Science* **2012**, *2* (1), 73–78.
- (11) A. V. Marenich, C. J. Cramer, D. G. Truhlar, *J. Phys. Chem. B*, **2009**, *113*, 6378–6396.
- (12) C. Kollmar, K. Sivalingam, B. Helmich-Paris, C. Angeli, F. Neese, *J. Comput. Chem.* **2019**, *40*, 1463–1470.
- (13) F. Weigend, *J. Comput. Chem.* **2007**, *29*, 167–175.
- (14) (a) C. Angeli, R. Cimiraglia, S. Evangelisti, T. Leininger, J.-P. Malrieu, *J. Chem. Phys.* **2001**, *114* (23), 10252–10264; (b) C. Angeli, R. Cimiraglia, J.-P. Malrieu, *Chem. Phys. Lett.* **2001**, *350*, 297–305; (c) C. Angeli, R. Cimiraglia, J.-P. Malrieu, *J. Chem. Phys.* **2002**, *117* (20), 9138–9153.
- (15) F. Neese, *J. Chem. Phys.* **2005**, *122* (3), 034107.
- (16) S. Khan, R. Pollet, R. Vuilleumier, J. Kowalewski, M. Odelius, *J. Chem. Phys.* **2017**, *147*, 244306.
- (17) H. M. Irving, M. G. Miles, L. Pettit, *Anal. Chim. Acta* **1967**, *38*, 475–488

- (18) L. Zékány, I. Nagypál in “*Computational Method for Determination of Formation Constants*” Ed. Legett D J, Plenum, New York, **1985**, p. 291.
- (19) R. L. Gustafson, A. E. Martell, *J. Phys. Chem.* **1963**, *67*, 576–582
- (20) J. Felcman, J. da Silva, *Talanta*, **1983**, *30*, 565
- (21) R. Delgado, et al, *Talanta*, **1997**, *45*, 451
- (22) A. Brausam, J. Maigut, R. Meier, P. A. Szilágyi, H.-J. Buschmann, W. Massa, Z. Homonnay, R. van Eldik, *Inorg. Chem.* **2009**, *48*, 7864–7884.
- (23) A. E. Martell, S. M. Smith, *Critical stability constants* Vol 1-5. New York: Plenum Press; 1974-1982
- (24) J. Carr et al. *Anal. Chem.* **1971**, *43*, 1520
- (25) J. Watters et al, *J. Inorg. Nucl. Chem.* **1968**, *30*, 3359
- (26) M. Taqui-Khan and A. E. Martell, *J. Am. Chem. Soc.* **1968**, *90*, 3386
- (27) (a) C. Lagercrantz, *Acta Chem. Scand.*, **1964**, *18*, 562; (b) H. Dahn, L. Loewe, C. A. Bunton, *Helv. Chim. Acta*, **1960**, *43*, 320; (c) Y. Kirino, P. L. Southwick, and R. H. Schuler, *J. Am. Chem. Soc.*, **1974**, *96*, 673
- (28) T. J. Swift, R. E. Connick, *J. Chem. Phys.* **1962**, *37*, 307.
- (29) J. R. Zimmermann, W. E. Brittin, *J. Phys. Chem.* **1957**, *61*, 1328.
- (30) A. D. McLachlan, *Proc. R. Soc. London, A*, **1964**, *280*, 271-288.
- (31) Z. Luz, S. Meiboom, *J. Chem. Phys.* **1964**, *40*, 2686.
- (32) *The Chemistry of Contrast Agents in Medical Magnetic Resonance Imaging* (Eds: A. E. Merbach, E. Tóth), Wiley, New York, **2001**.
- (33) J. H. Freed, *J. Chem. Phys.* **1978**, *68*, 4034.
- (34) S. H. Koenig, R. D. Brown III, *Prog. Nucl. Magn. Reson. Spectrosc.* **1991**, *22*, 487.
- (35) R. Meier, F. W. Heinemann, *Inorg. Chim. Acta* **2002**, *337*, 317-327.
